# Supplementary material for: Diterpenoids from Euphorbia gedrosiaca as Potential Anti-Proliferative Agents against Breast Cancer Cells
Source: MDPI journal article supplement (doi:10.3390/metabo13020225), 2023-02-03
Supplement: s1 [file s1]

# Supplementary materials

## List of Contents

Figure S1.  $^1\text{H}$  NMR (400 MHz) spectrum of compound 1

Figure S2.  $^{13}\text{C}$  NMR (100 MHz) spectrum of compound 1

Figure S3.  $^{13}\text{C}$  DEPT135 (100 MHz) spectrum of compound 1

Figure S4.  $^{13}\text{C}$  DEPT90 (100 MHz) spectrum of compound 1

Figure S5. HSQC (400 MHz) spectrum of compound 1

Figure S6. HMBC (400 MHz) spectrum of compound 1

Figure S7. DQF-COSY (400 MHz) spectrum of compound 1

Figure S8. FT-IR spectrum of compound 1

Figure S9. (A) Selected HMBC and COSY correlations and (B) representation of key NOESY cross peaks of compound 1

Figure S10. NOESY (400 MHz) spectrum of compound 1

Figure S11. HR-ESI-MS spectrum of compound 1

Figure S12.  $^1\text{H}$  NMR (400 MHz) spectrum of compound 2

Figure S13.  $^{13}\text{C}$  NMR (100 MHz) spectrum of compound 2

Figure S14.  $^{13}\text{C}$  DEPT135 (100 MHz) spectrum of compound 2

Figure S15.  $^{13}\text{C}$  DEPT90 (100 MHz) spectrum of compound 2

Figure S16. HMBC (400 MHz) spectrum of compound 2

Figure S17. HR-ESI-MS spectrum of compound 2

Figure S18. FT-IR spectrum of compound 2

Figure S19.  $^1\text{H}$  NMR (400 MHz) spectrum of compound 3

Figure S20.  $^{13}\text{C}$  NMR (100 MHz) spectrum of compound 3

Figure S21.  $^{13}\text{C}$  DEPT135 (100 MHz) spectrum of compound 3

Figure S22.  $^{13}\text{C}$  DEPT90 (100 MHz) spectrum of compound 3

Figure S23. HR-ESI-MS spectrum of compound 3

Figure S24. FT-IR spectrum of compound 3

Figure S25.  $^1\text{H}$  NMR (400 MHz) spectrum compound 4

Figure S26.  $^{13}\text{C}$  NMR (100 MHz) spectrum of compound 4

Figure S27. HR-ESI-MS spectrum of compound 4

Figure S28. FT-IR spectrum of compound 4

Figure S29.  $^1\text{H}$  NMR (400 MHz) spectrum of compound 5

Figure S30.  $^{13}\text{C}$  NMR (100 MHz) spectrum of compound 5

Figure S31.  $^{13}\text{C}$  DEPT135 (100 MHz) spectrum of compound 5

Figure S32.  $^{13}\text{C}$  DEPT90 (100 MHz) spectrum of compound 5

Figure S33. HSQCGP (400 MHz) spectrum of compound 5

Figure S34. HMBCGP (400 MHz) spectrum of compound 5

Figure S35. HPLC chromatogram of fraction 5 showing peaks corresponding to compounds 1, 2 and 3

Figure S36. HPLC chromatogram of fraction 10-1 showing peak corresponding to compound 4

Figure S37. HPLC chromatogram of fraction 9 showing peak corresponding to compound 5

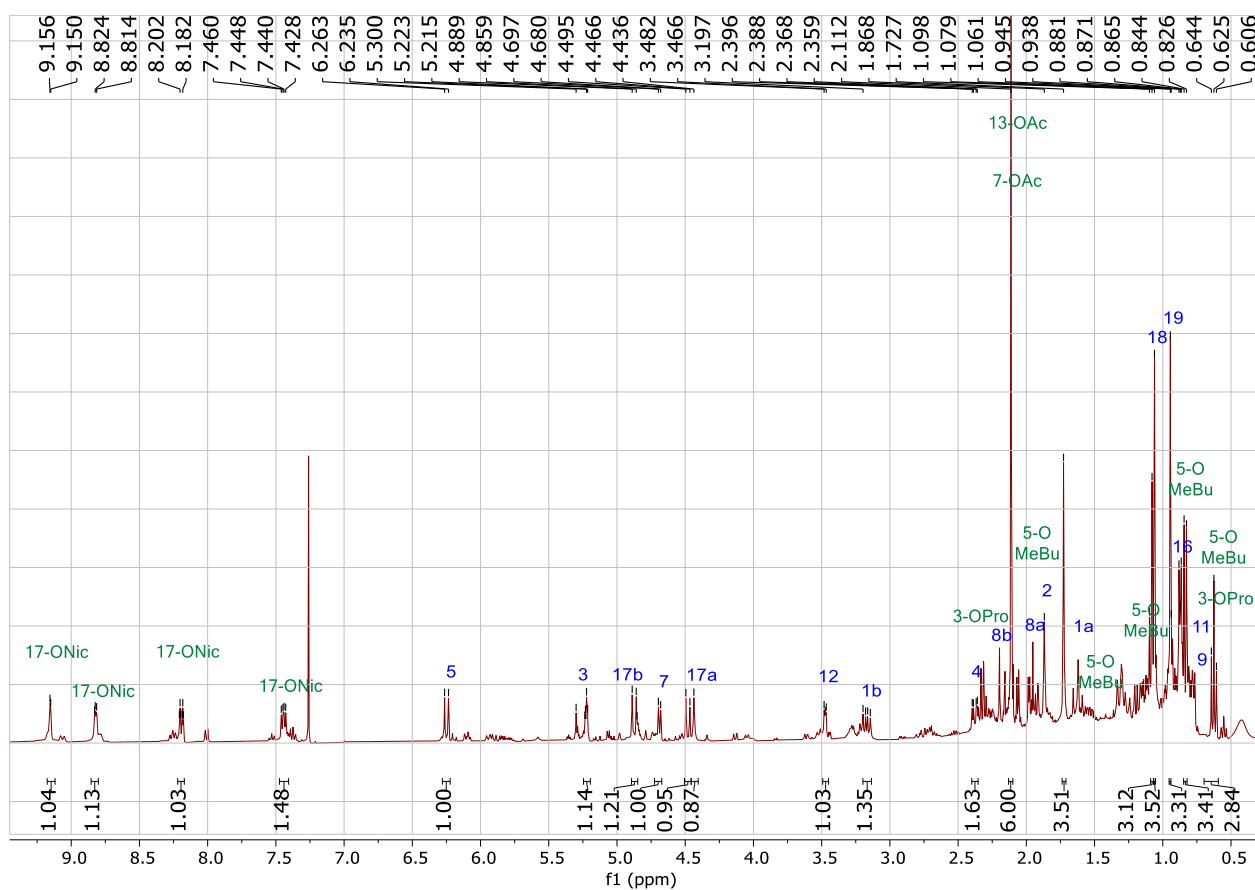

Figure S1.  $^1\text{H}$  NMR (400 MHz) spectrum of compound 1

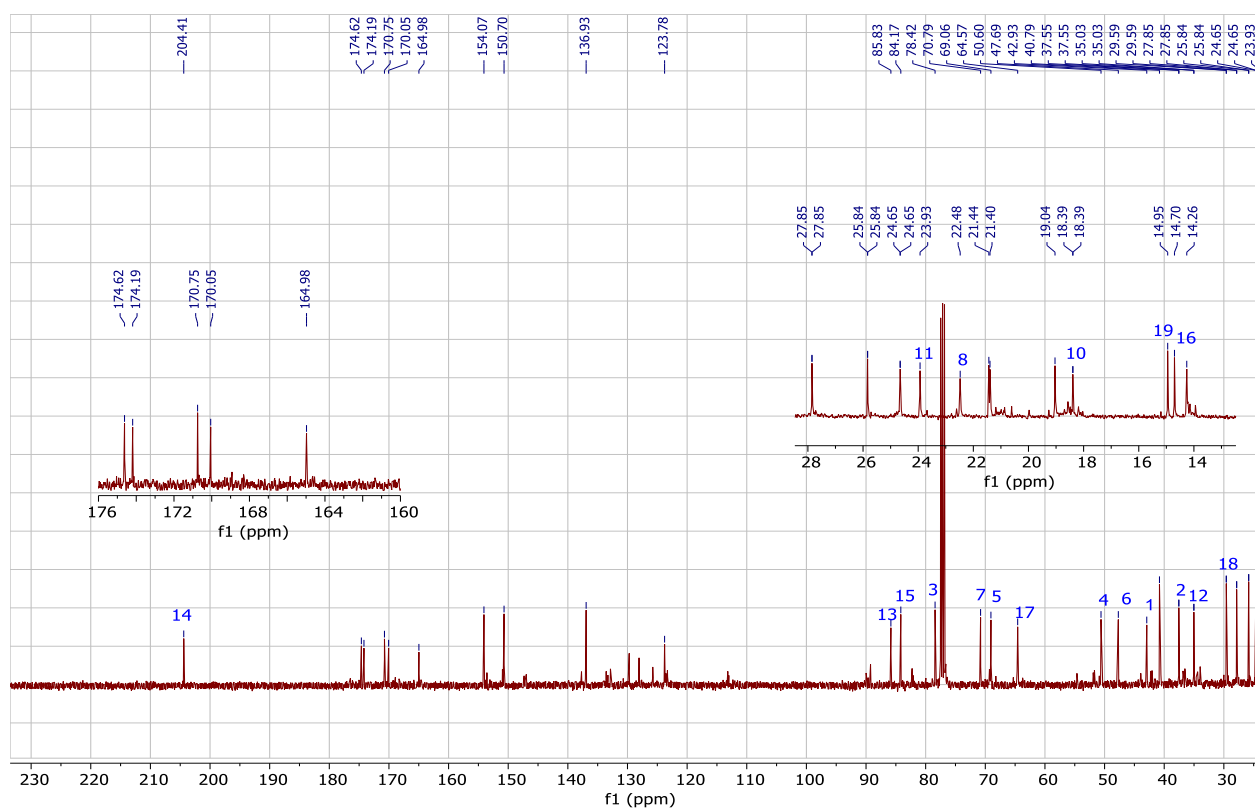

Figure S2.  $^{13}\text{C}$  NMR (100 MHz) spectrum of compound 1

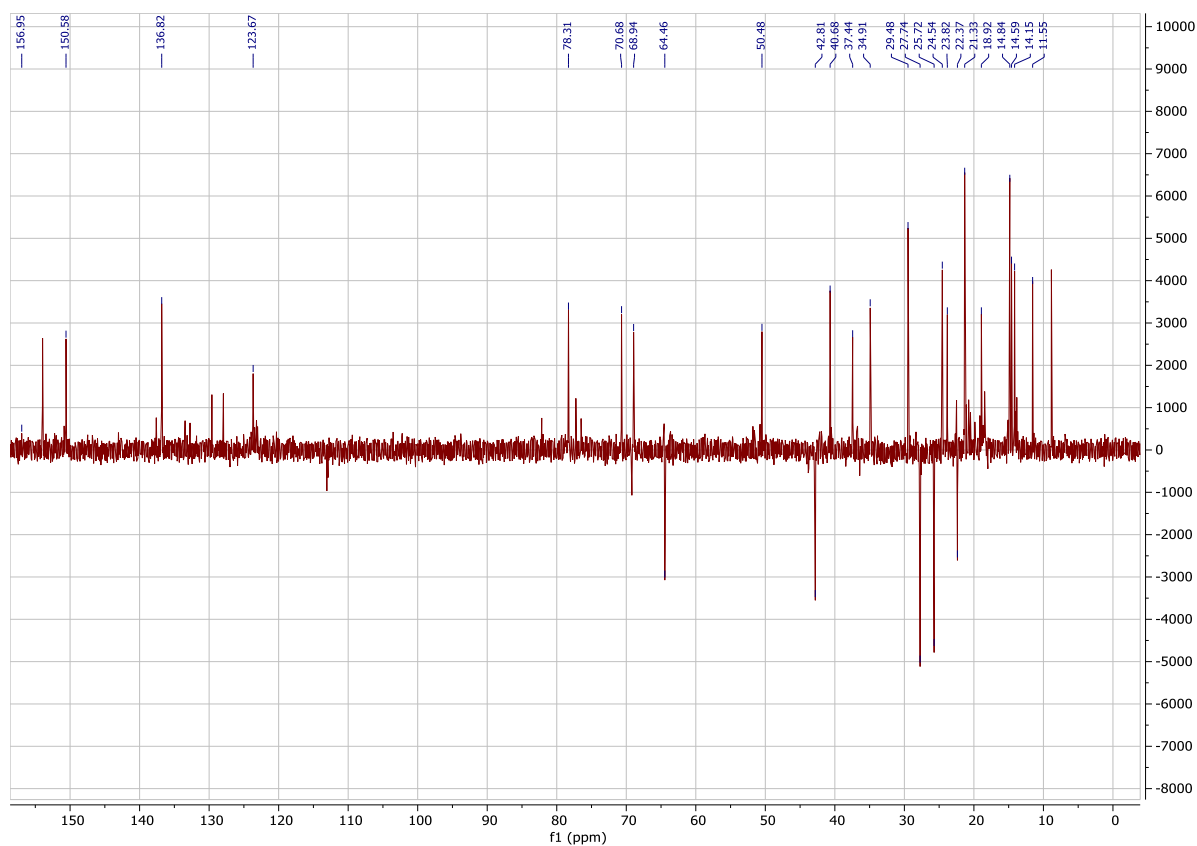

**Figure S3.**  $^{13}\text{C}$  DEPT135 (100 MHz) spectrum of compound **1**

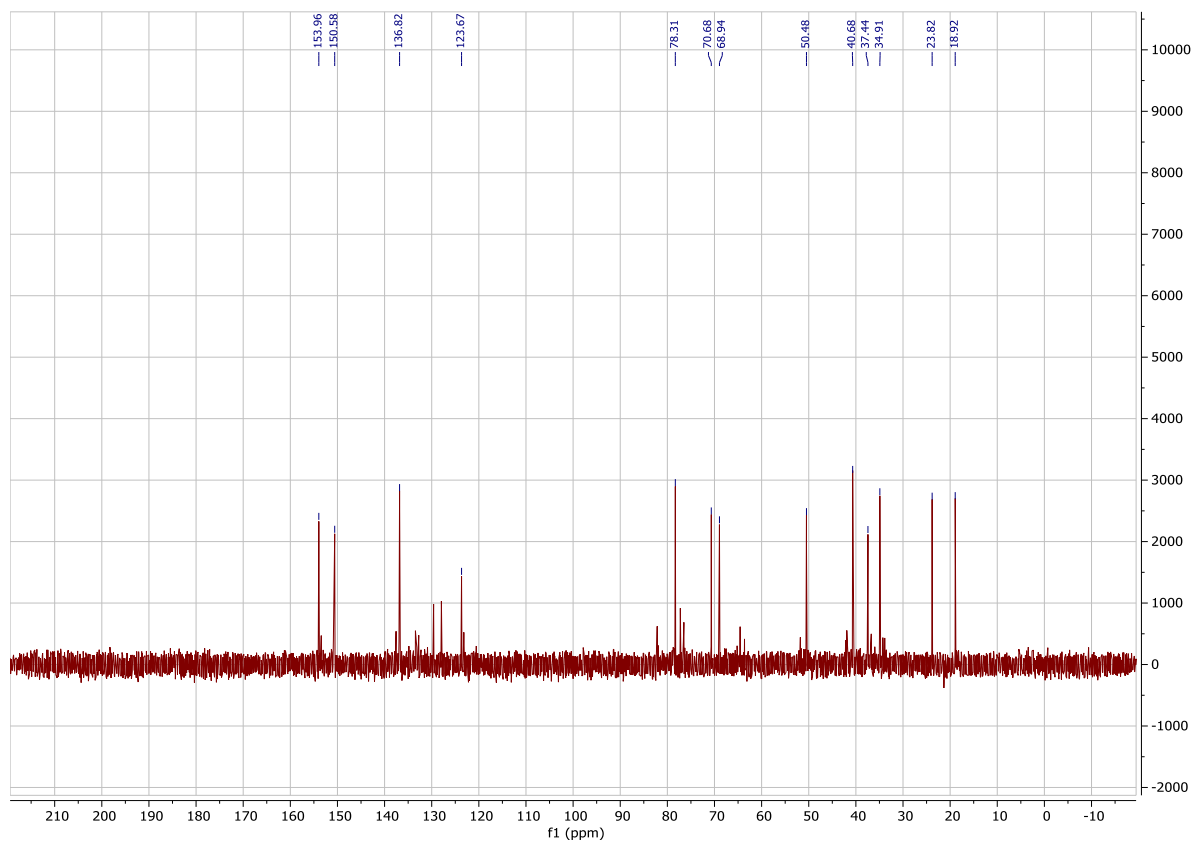

**Figure S4.**  $^{13}\text{C}$  DEPT90 (100 MHz) spectrum of compound **1**

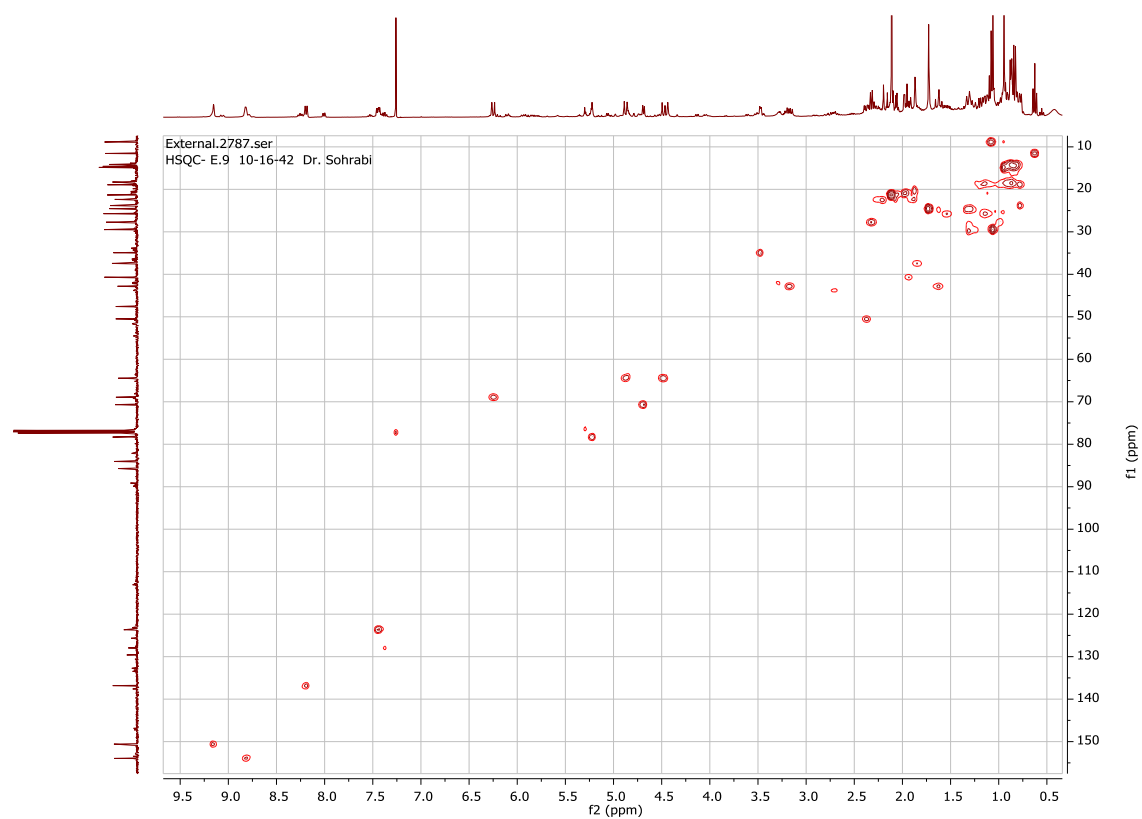

Figure S5. HSQCGP (400 MHz) spectrum of compound 1

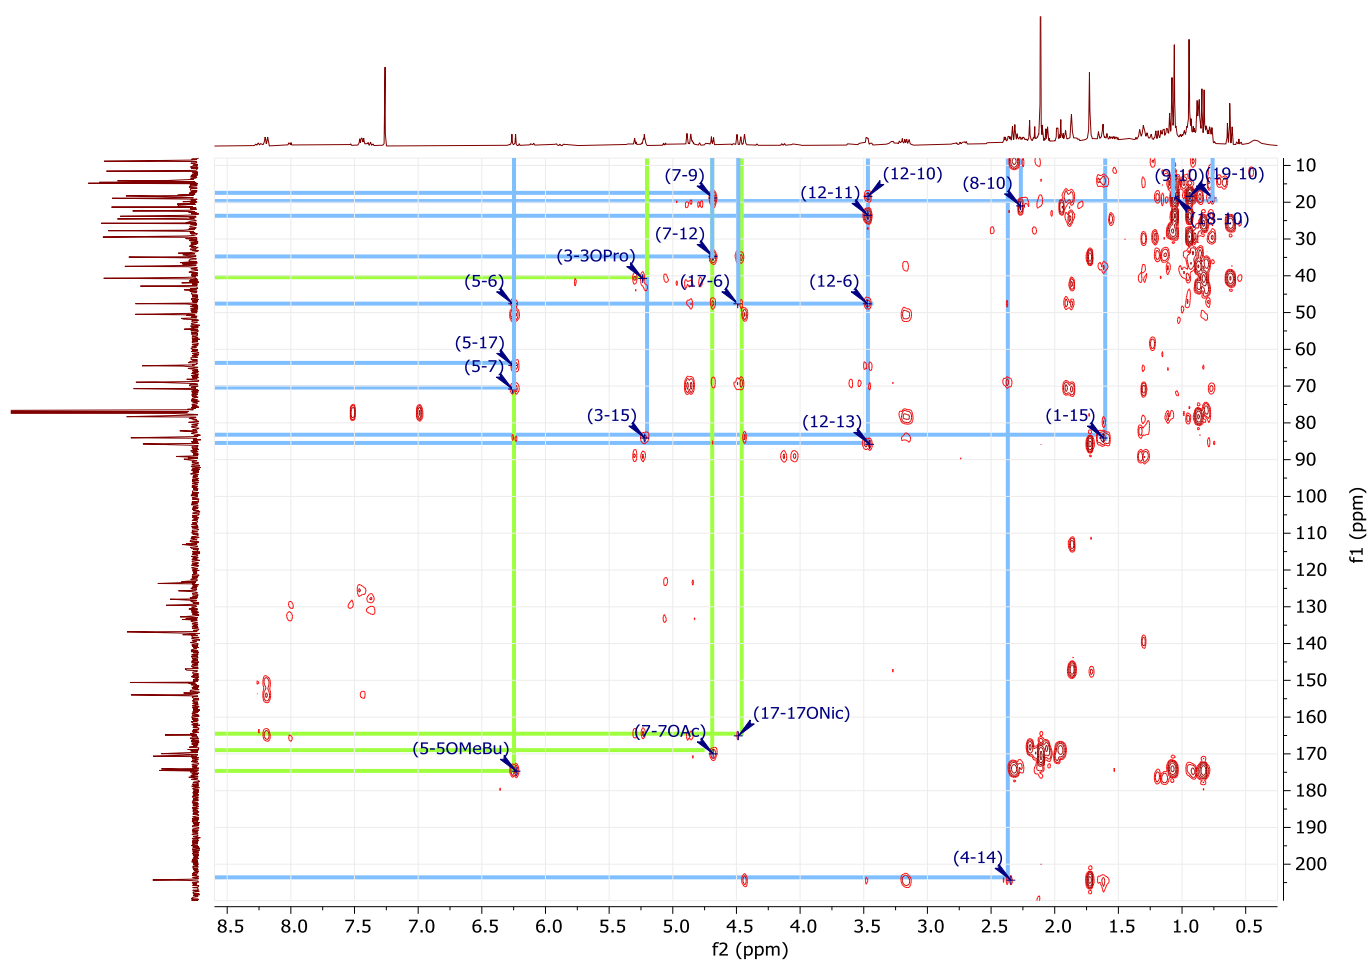

Figure S6. HMBCGP (400 MHz) spectrum of compound 1

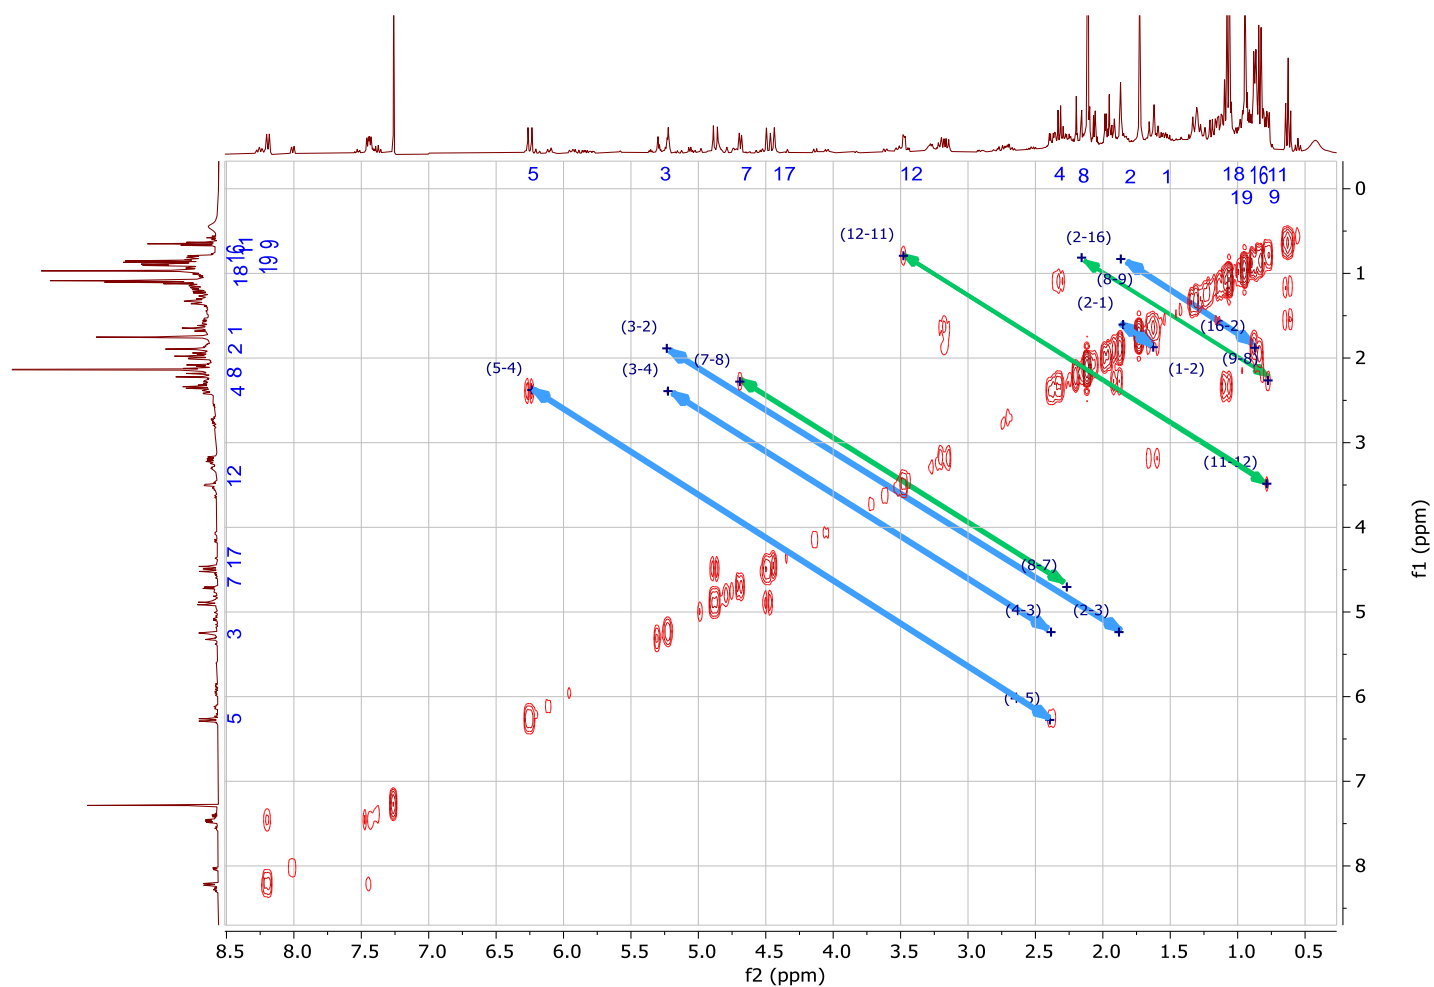

Figure S7. DQF-COSY (400 MHz) spectrum of compound **1**

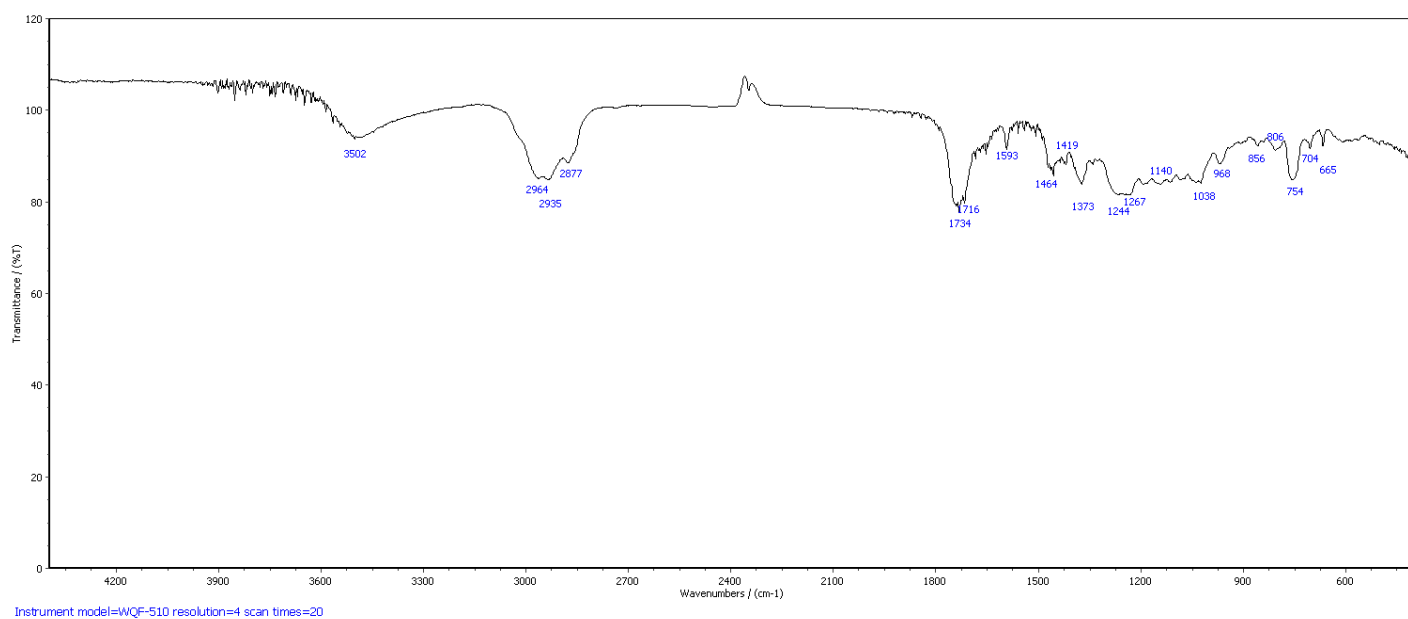

Instrument model=WQF-510 resolution=4 scan times=20

2006/12/31 6:20 YZ-11-EG.ASF

Figure S8. FT-IR spectrum of compound **1**

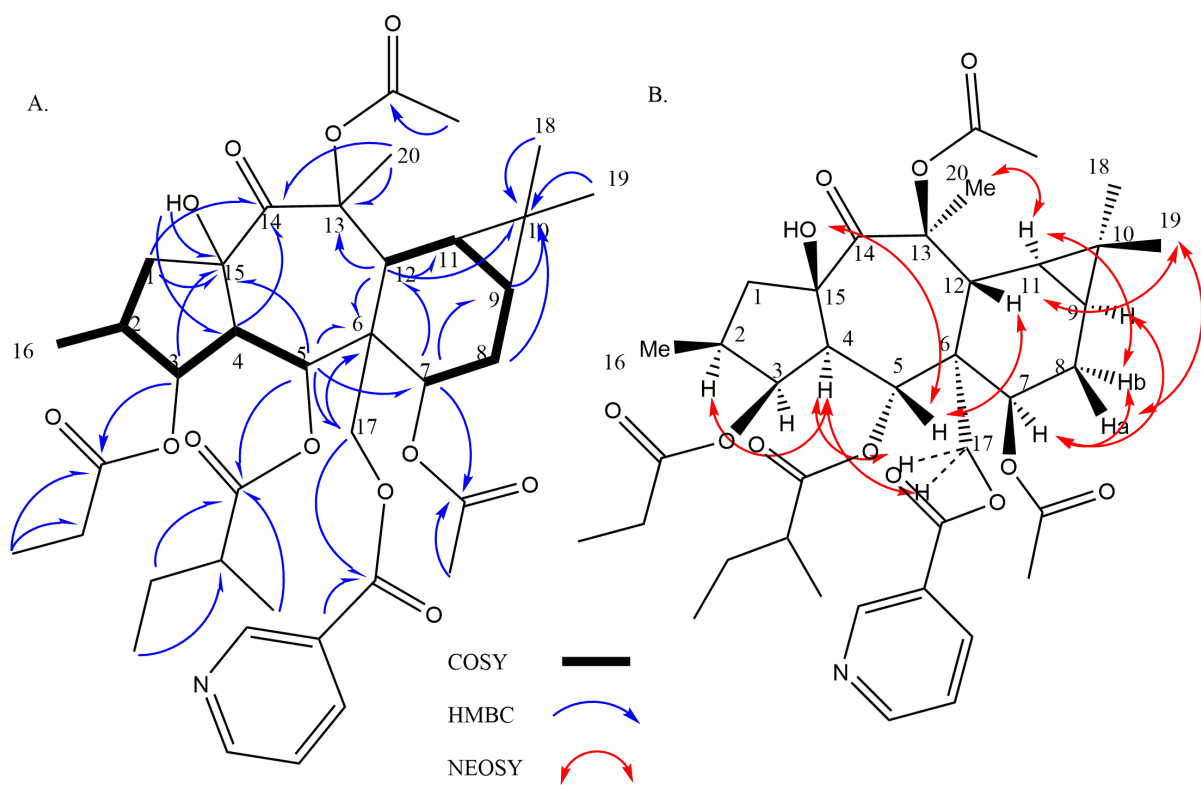

**Figure S9.**(A) Selected HMBC and COSY correlations and (B) representation of key NOESY cross peaks of compound **1**

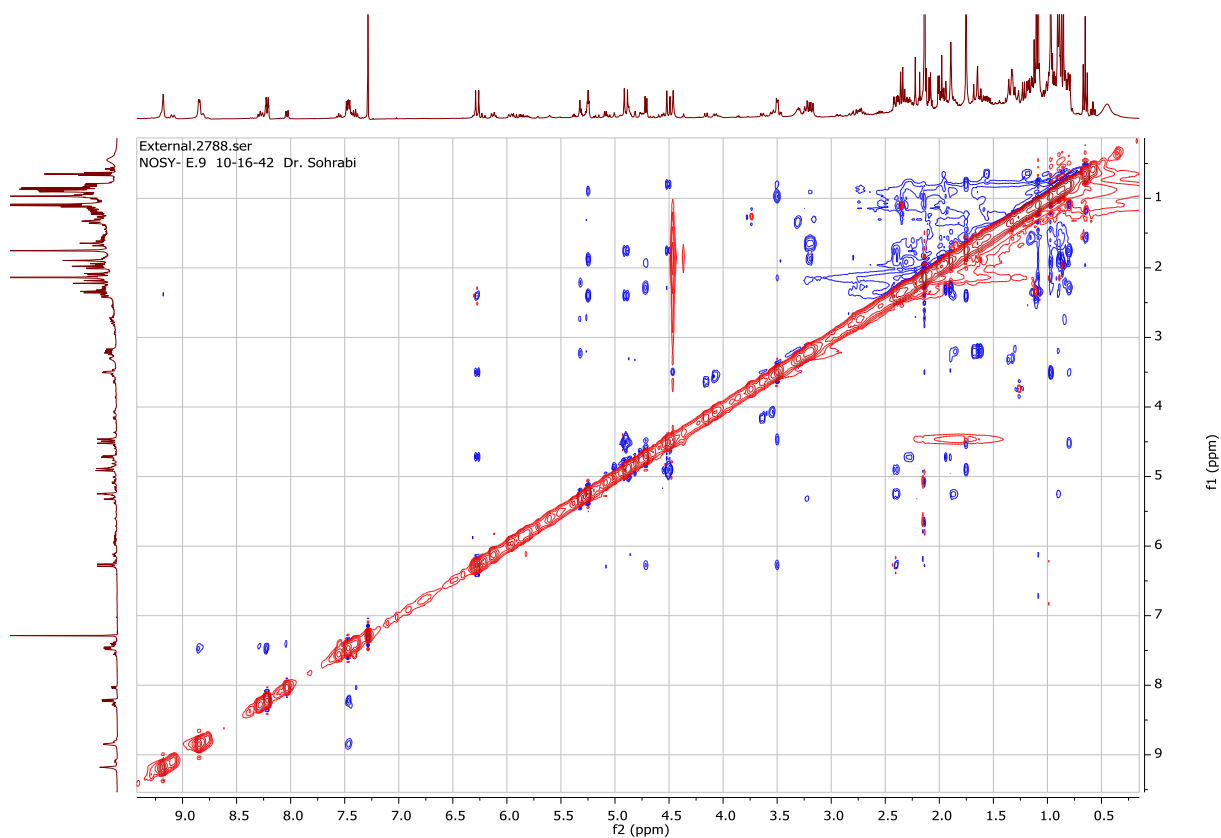

**Figure S10.** NOESY (400 MHz) spectrum of compound **1**

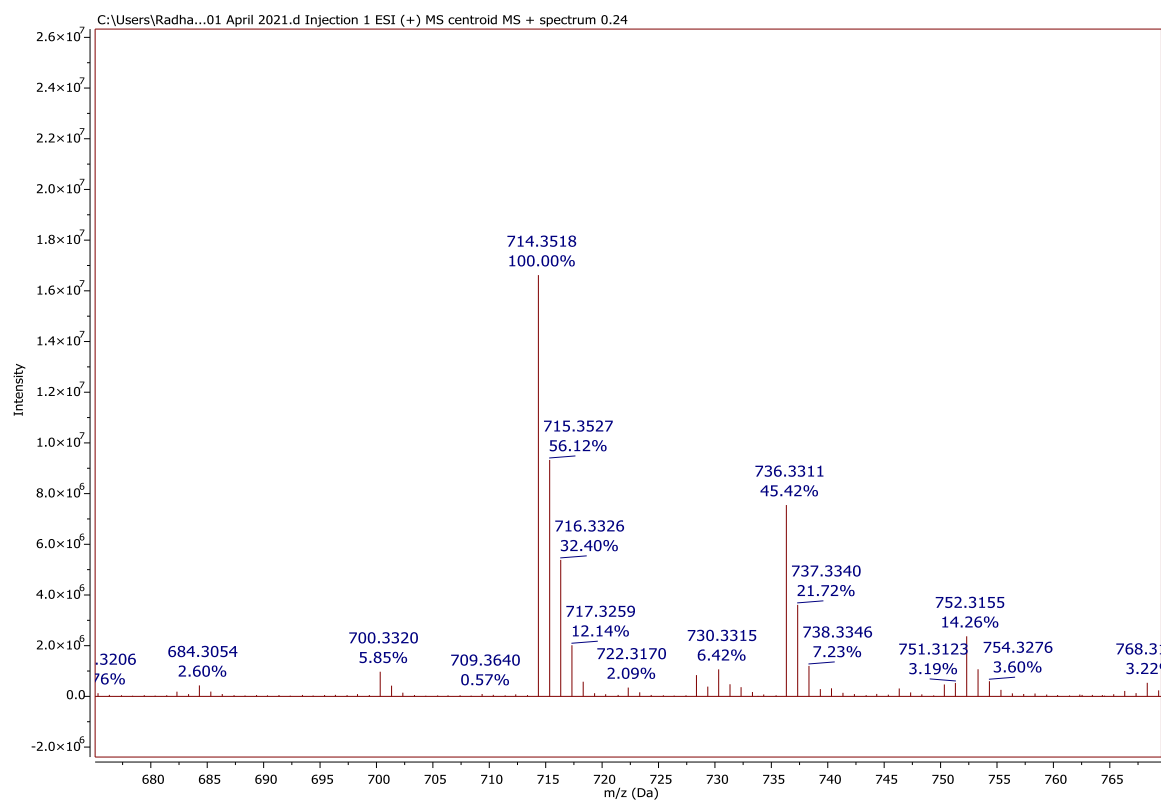

**Figure S11.** HR-ESI-MS spectrum of compound **1**



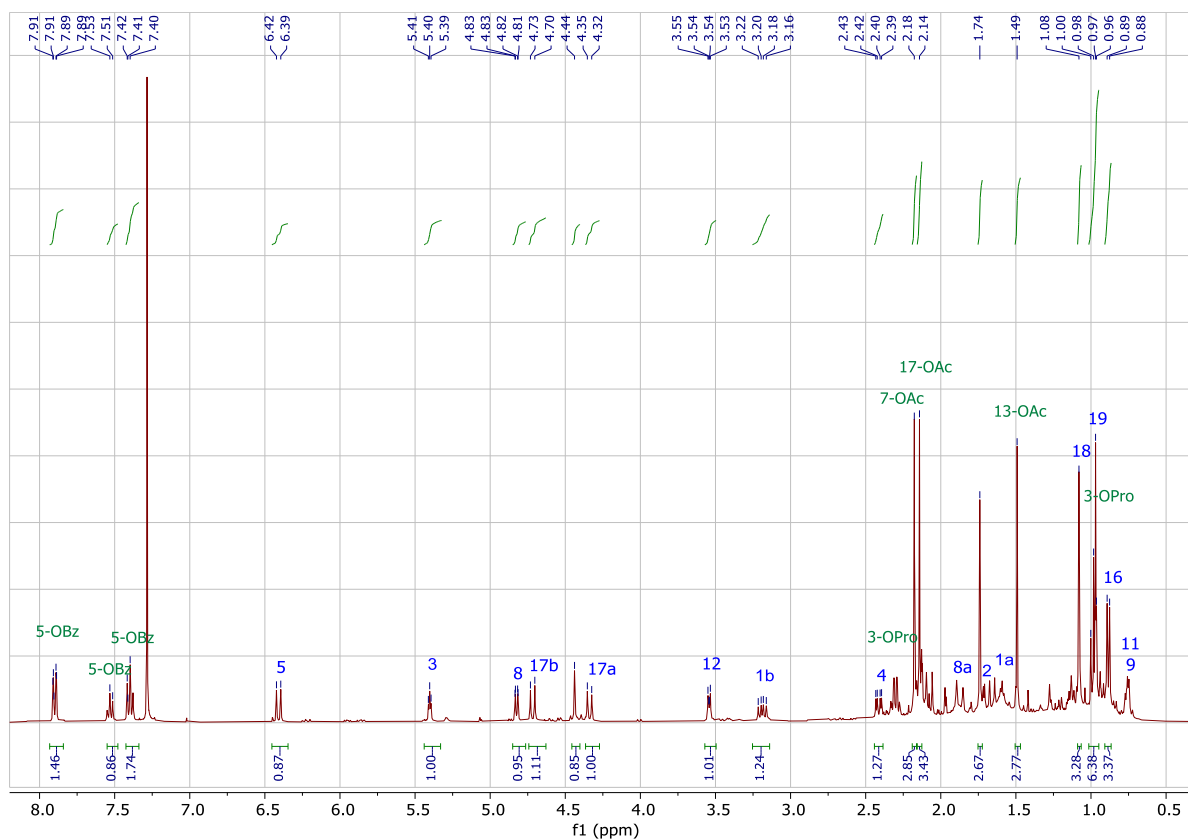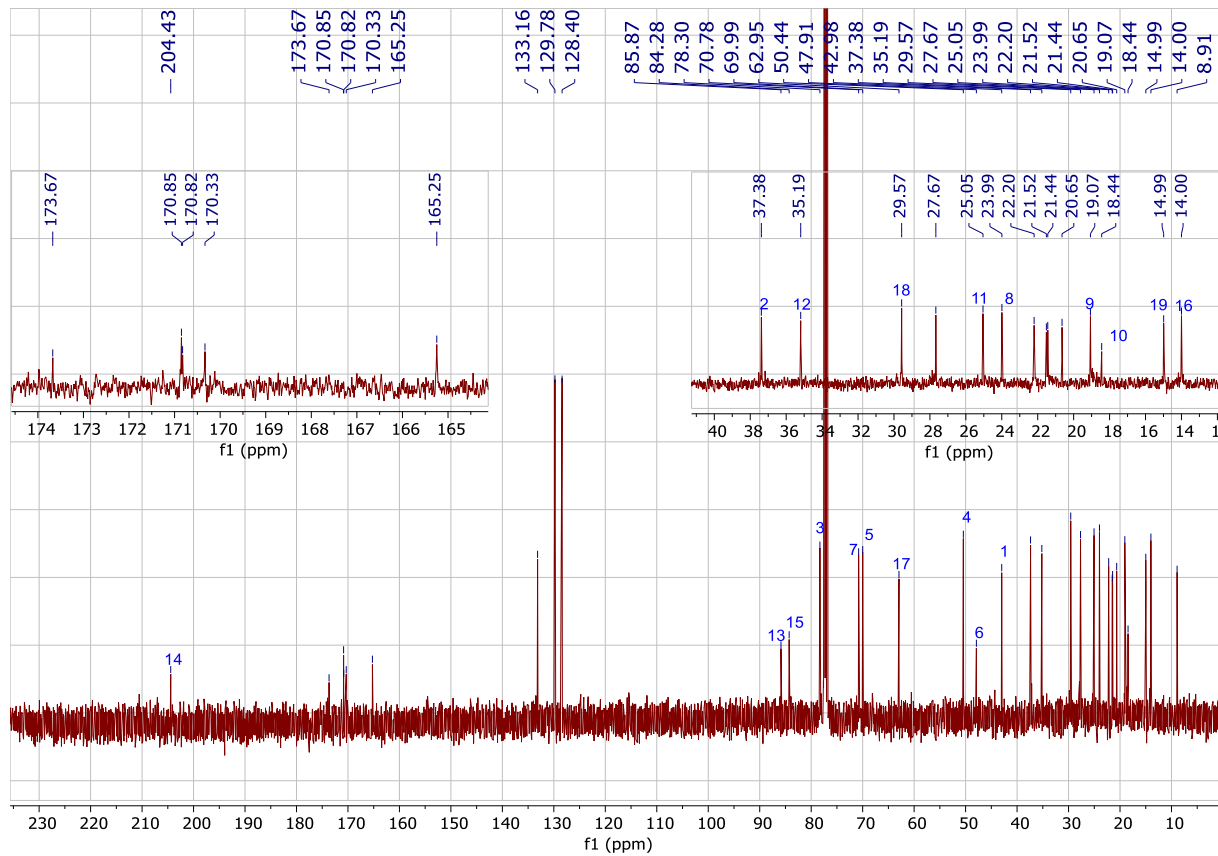

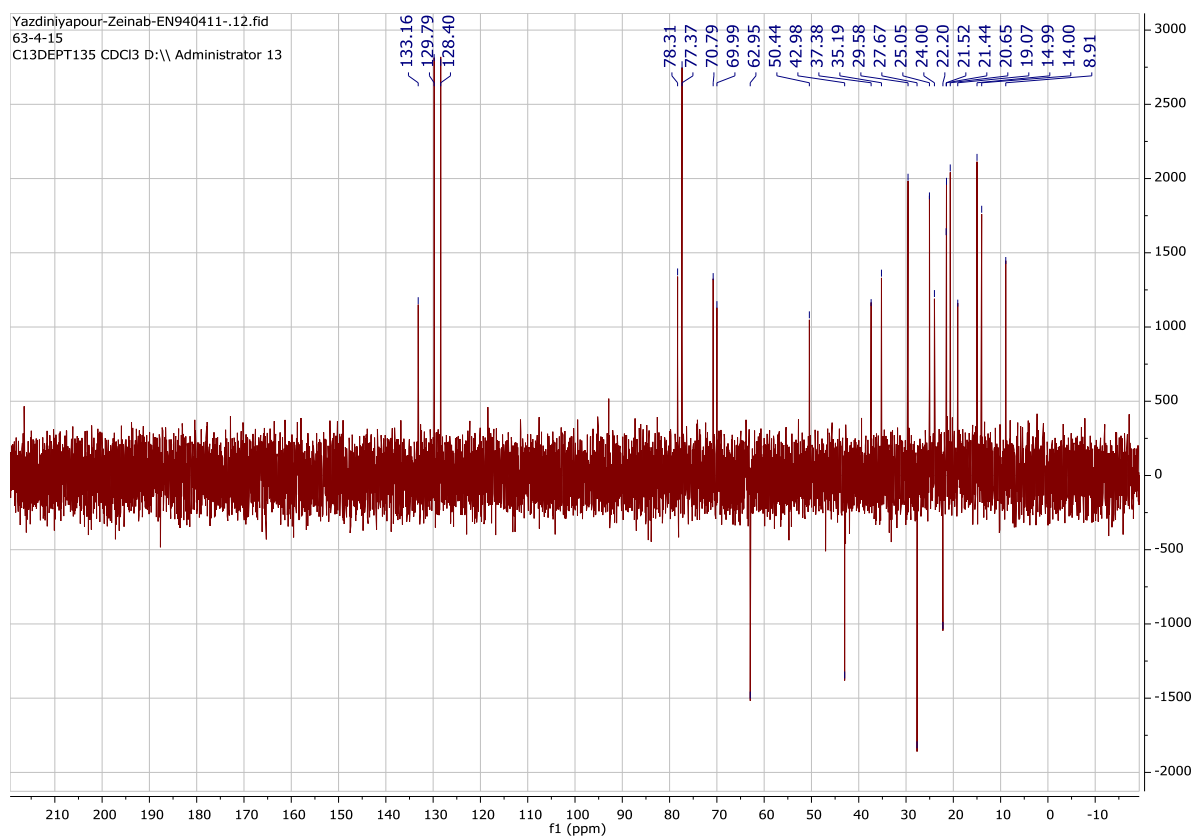

**Figure S14.**  $^{13}\text{C}$  DEPT135 (100 MHz) spectrum of compound **2**

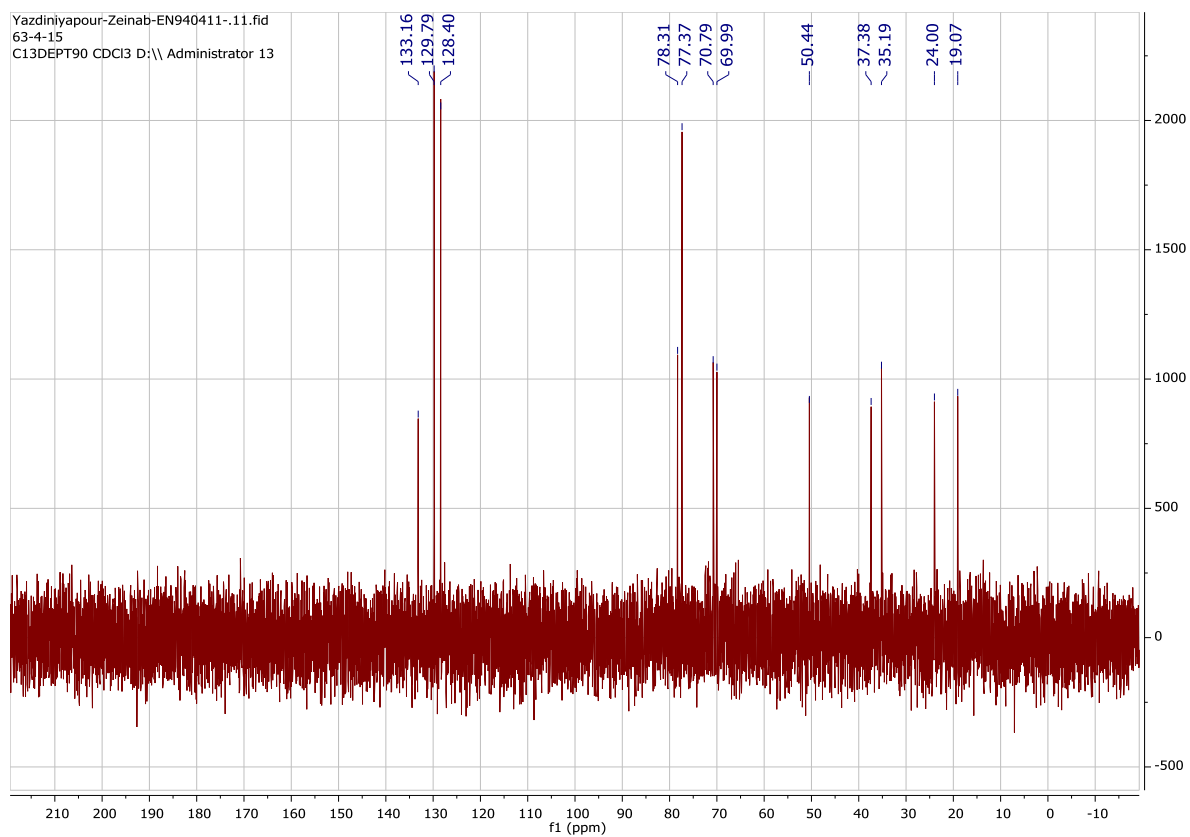

**Figure S15.**  $^{13}\text{C}$  DEPT90 (100 MHz) spectrum of compound **2**

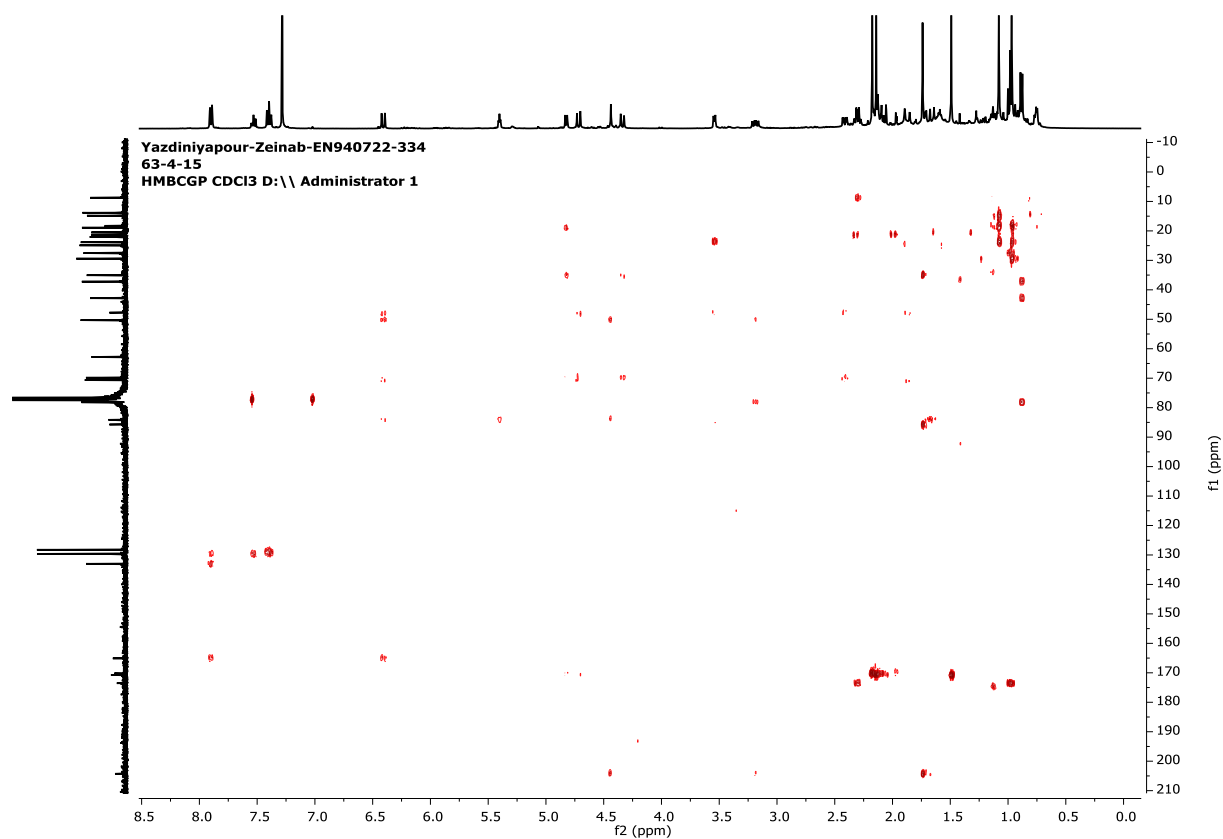

Figure S16. HMBCGP (400 MHz) spectrum of compound 2

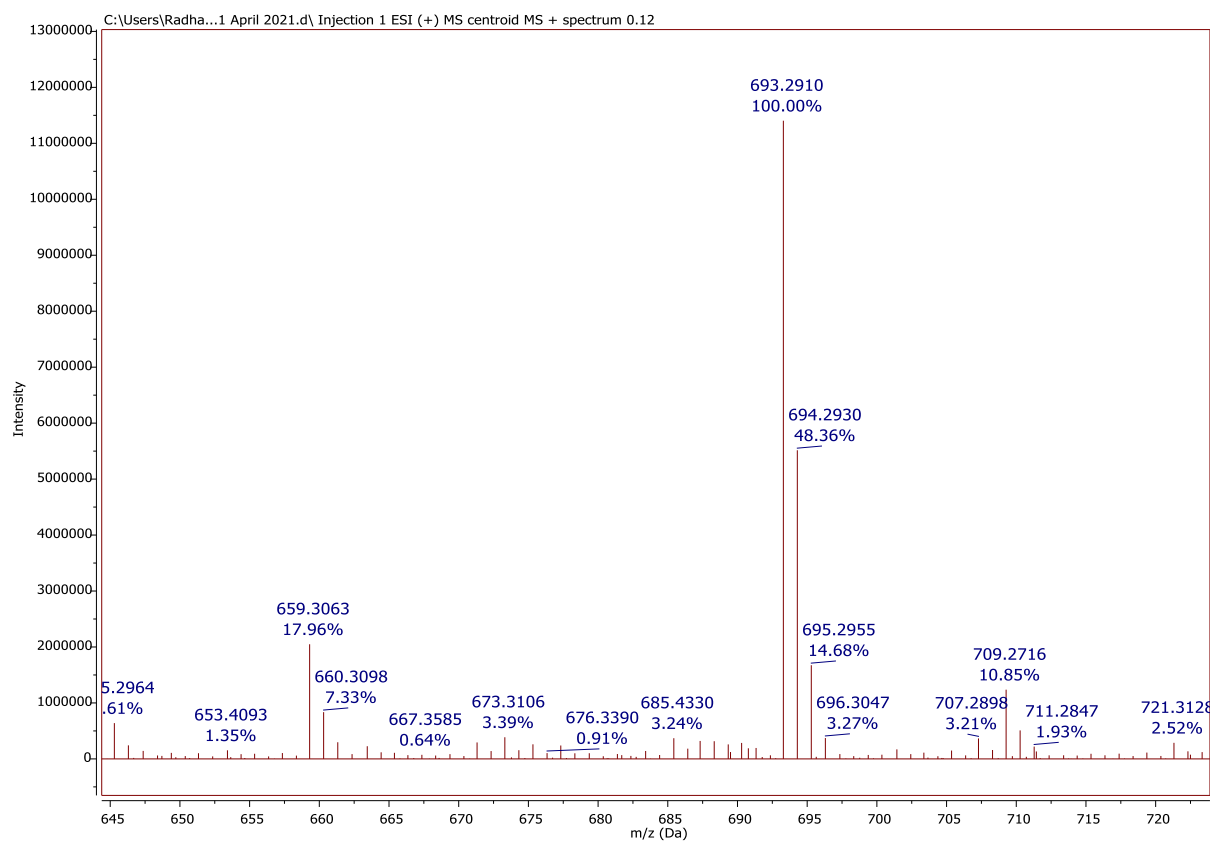

Figure S17. HR-ESI-MS spectrum of compound 2

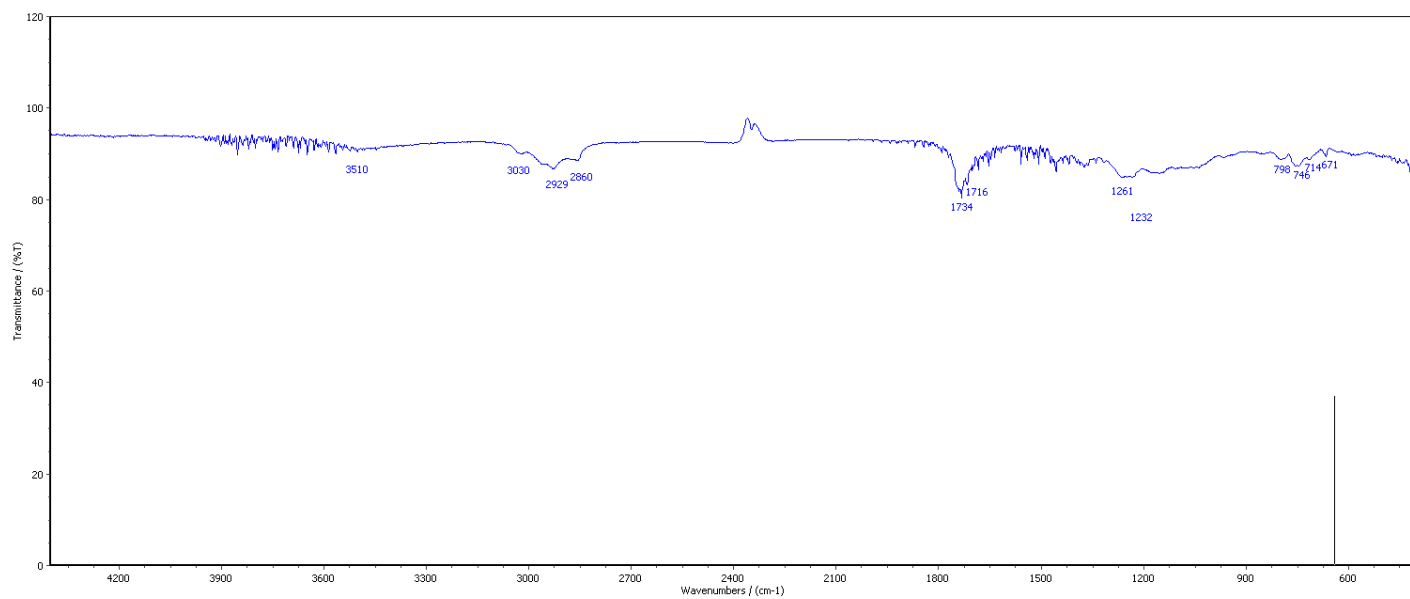

Instrument model=WQF-510 resolution=4 scan times=20

2006/12/31 6:20 YZ-8-EG-3.ASF

**Figure S18.** FT-IR spectrum of compound 2

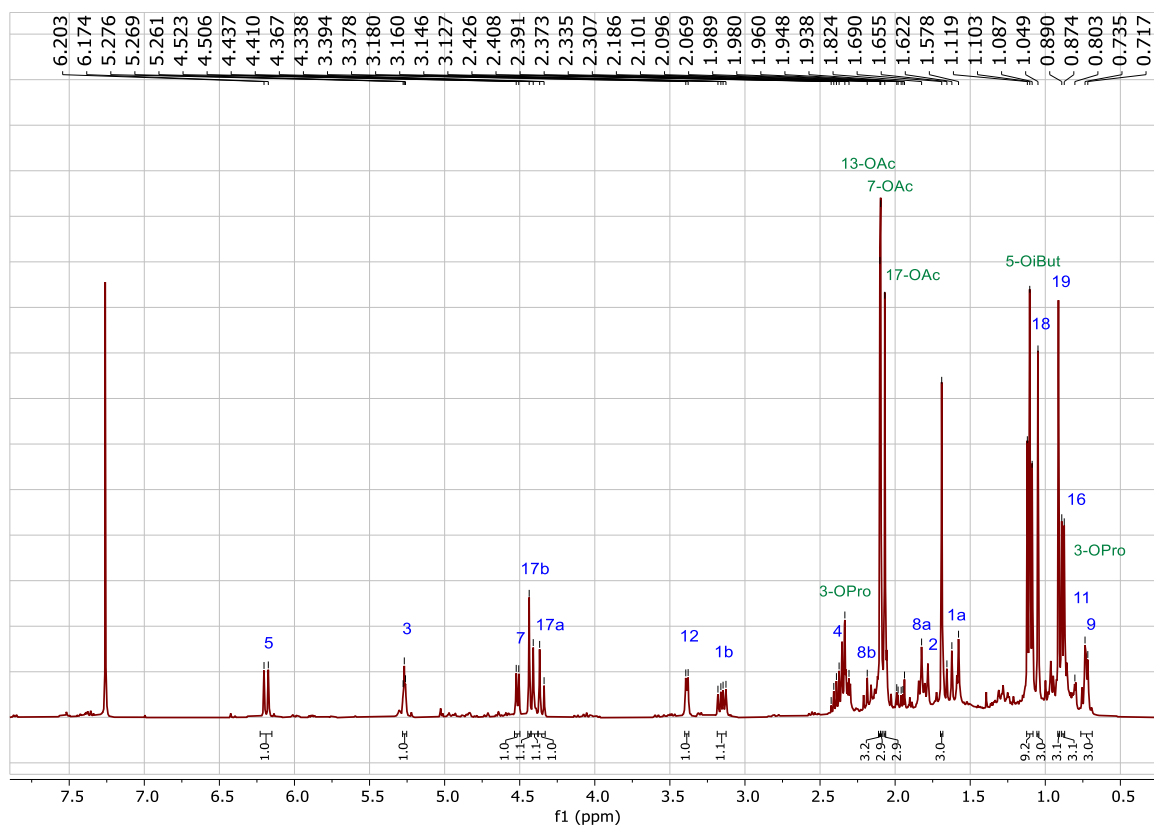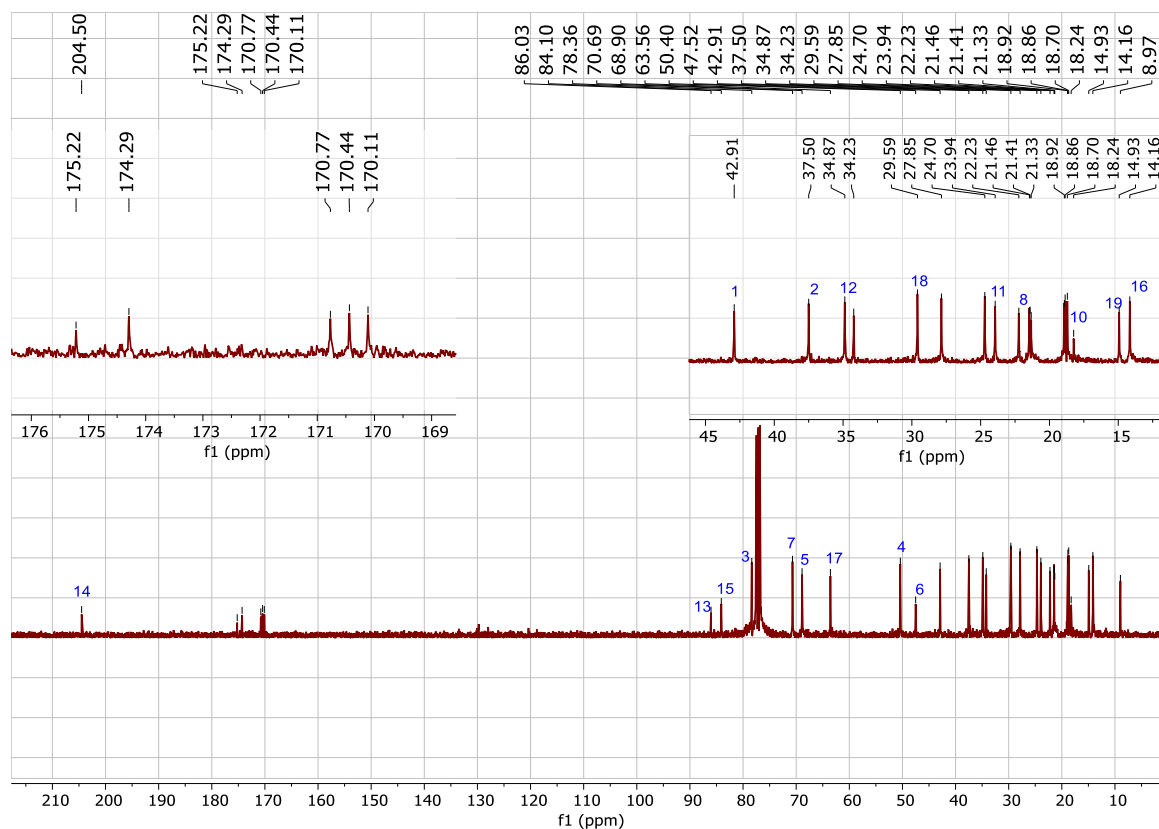

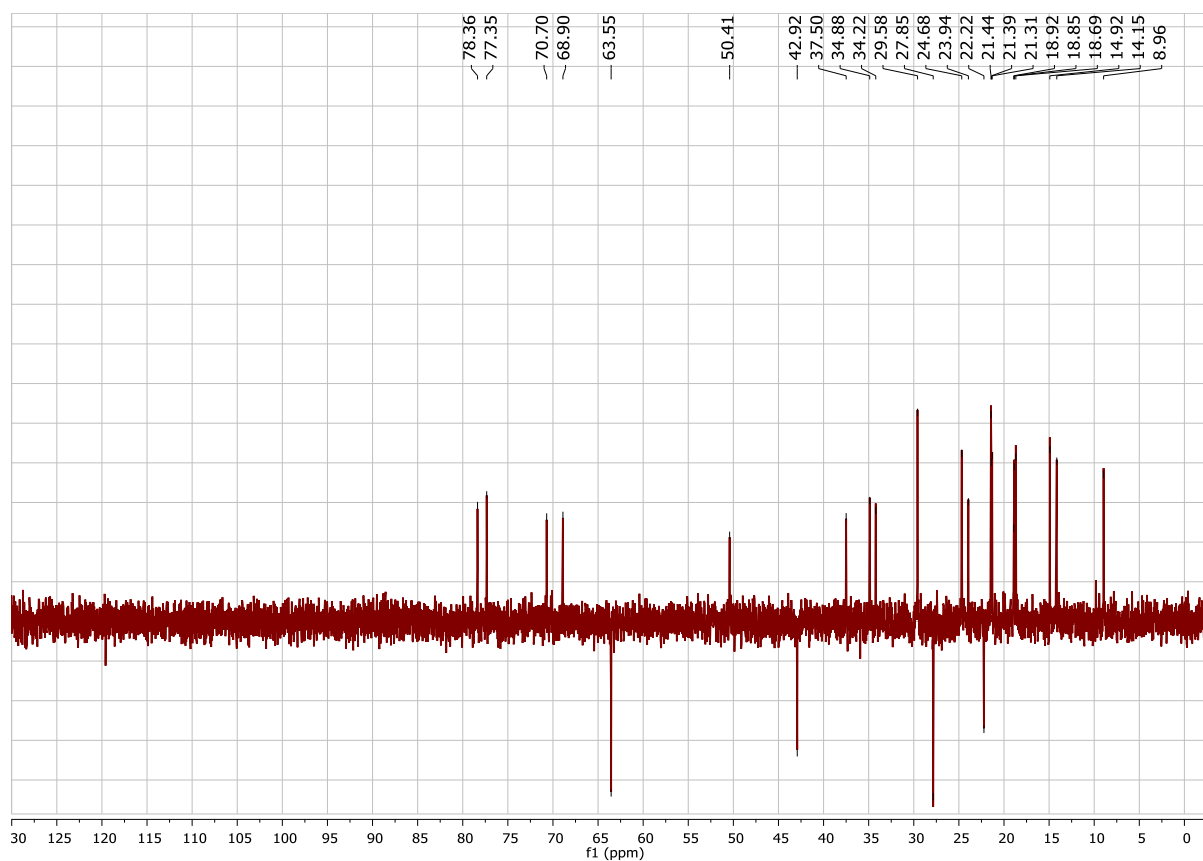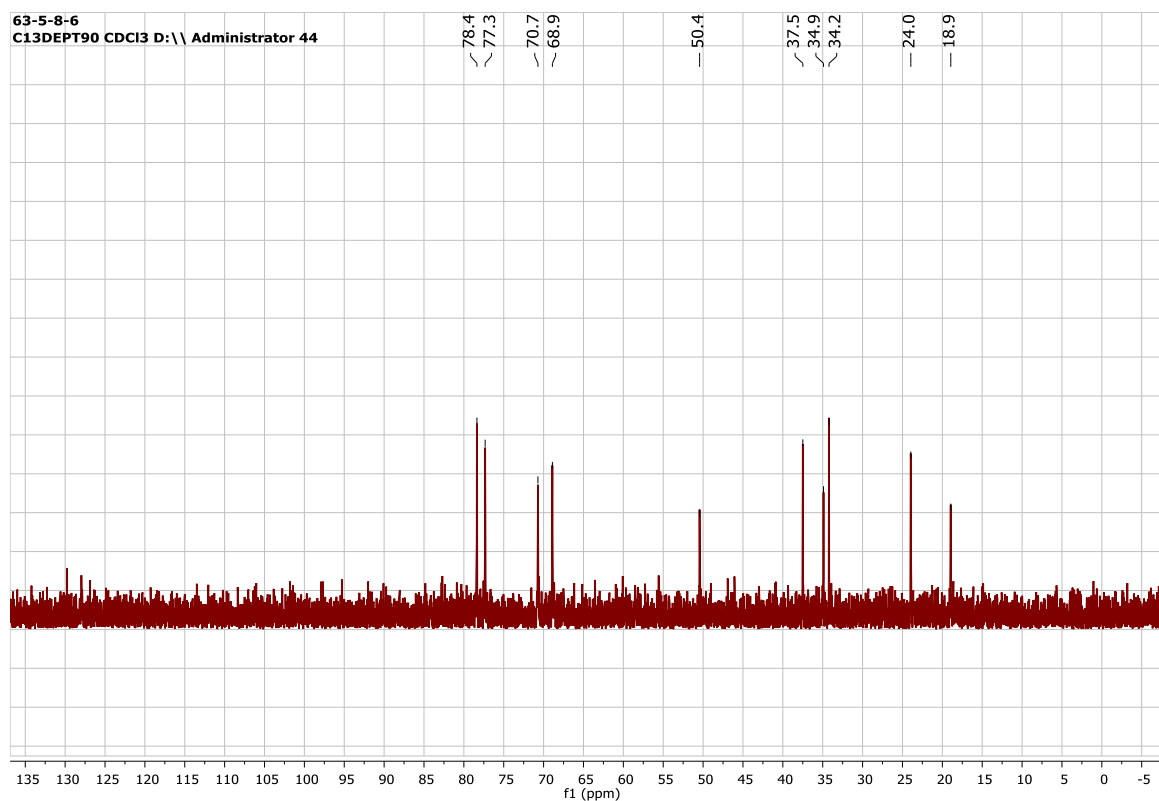

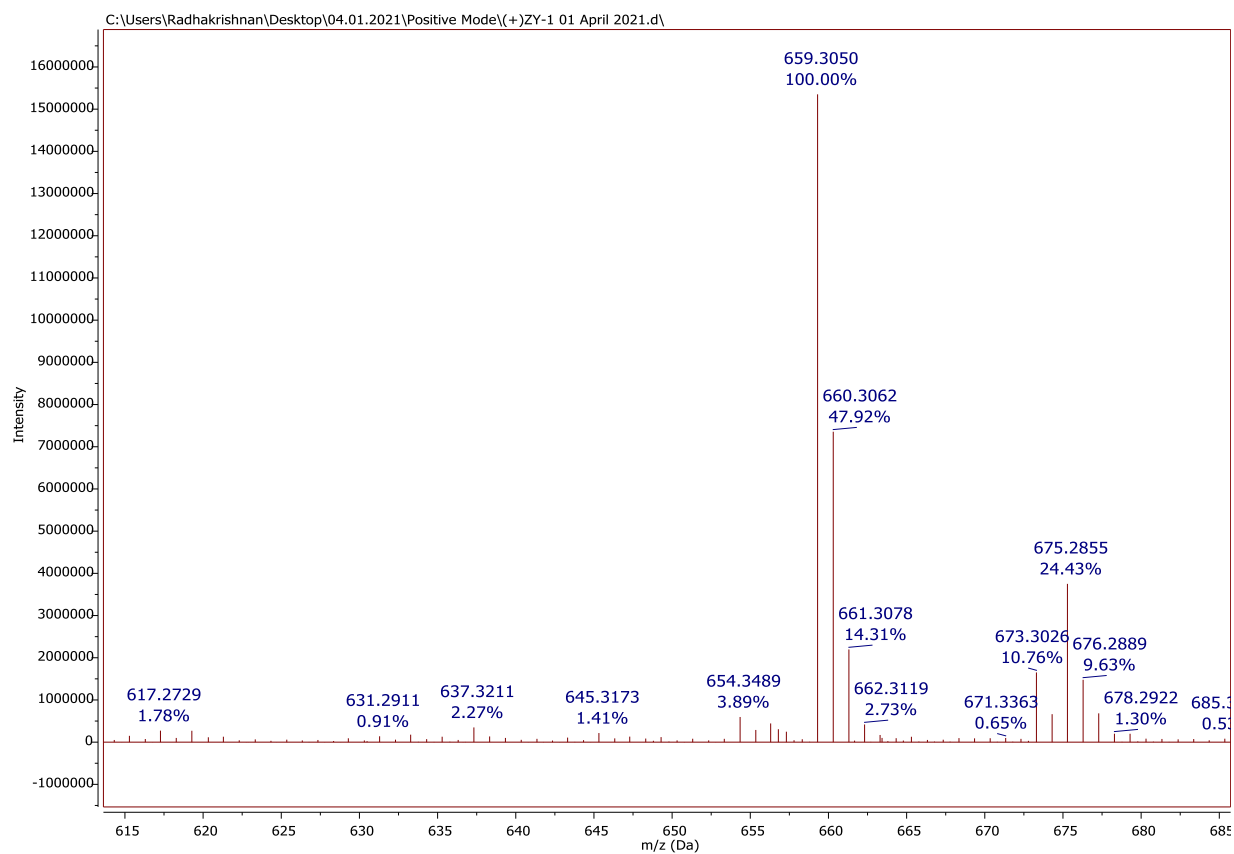

Figure S23. HR-ESI-MS spectrum of compound 3

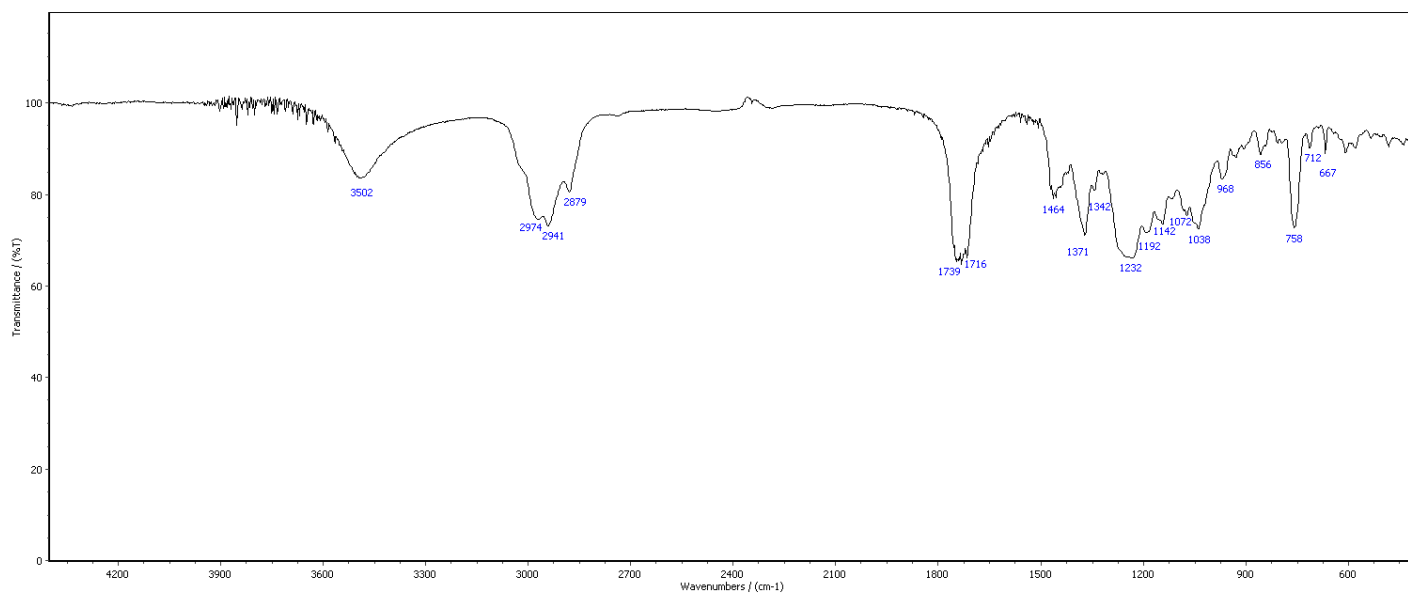

Instrument model=WQF-510 resolution=4 scan times=20

2006/12/31 6:20 YZ-2-EG-ASF

Figure S24. FT-IR spectrum of compound 3

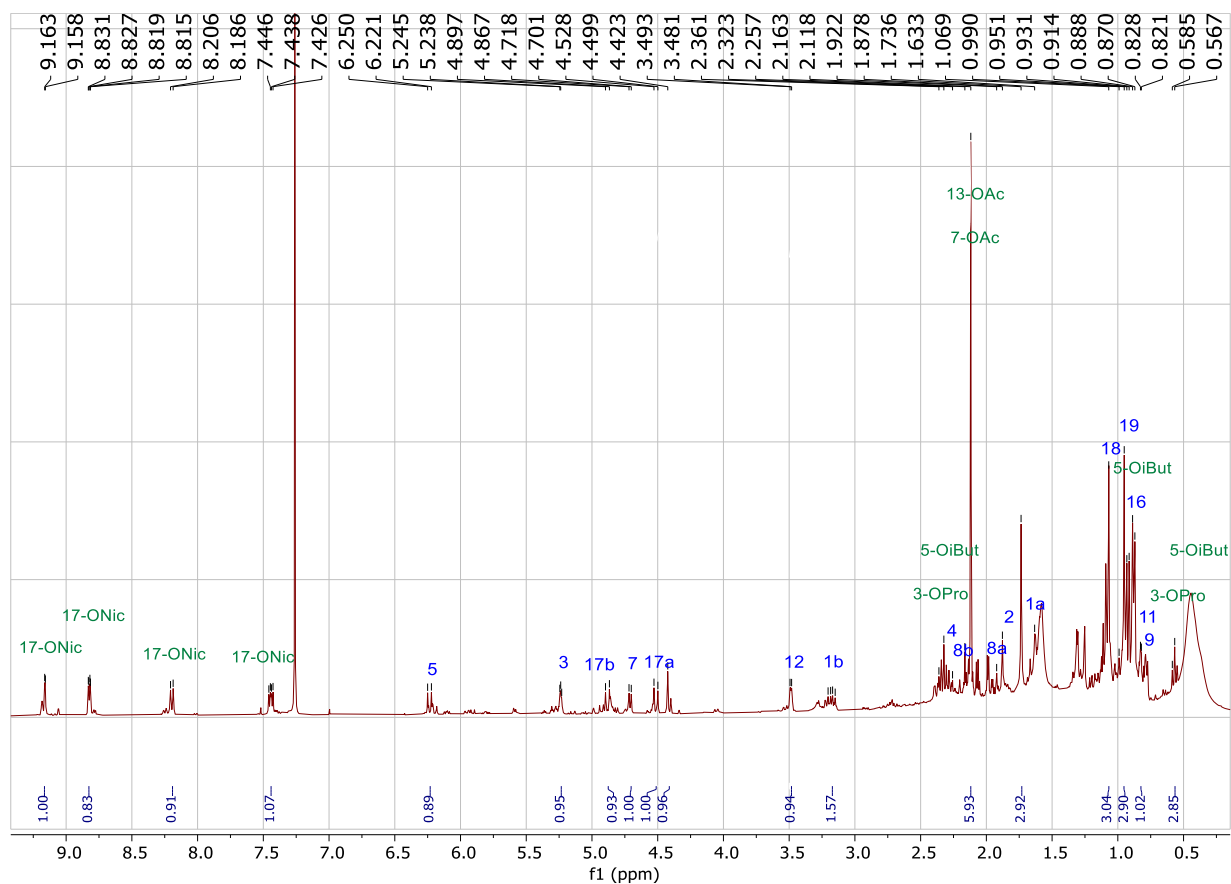

Figure S25.  $^1\text{H}$  NMR (400 MHz) spectrum compound 4

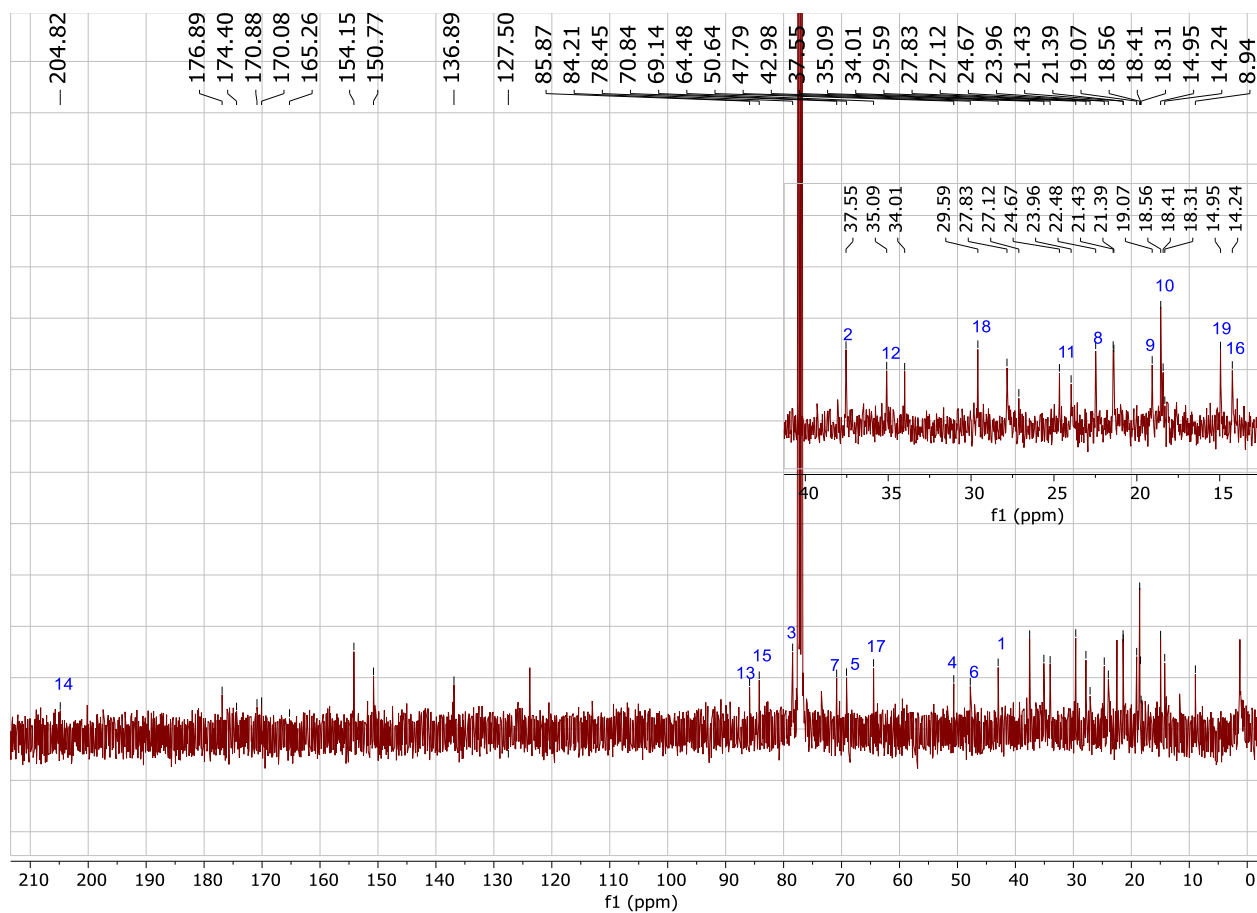

Figure S26.  $^{13}\text{C}$  NMR (100 MHz) spectrum of compound 4



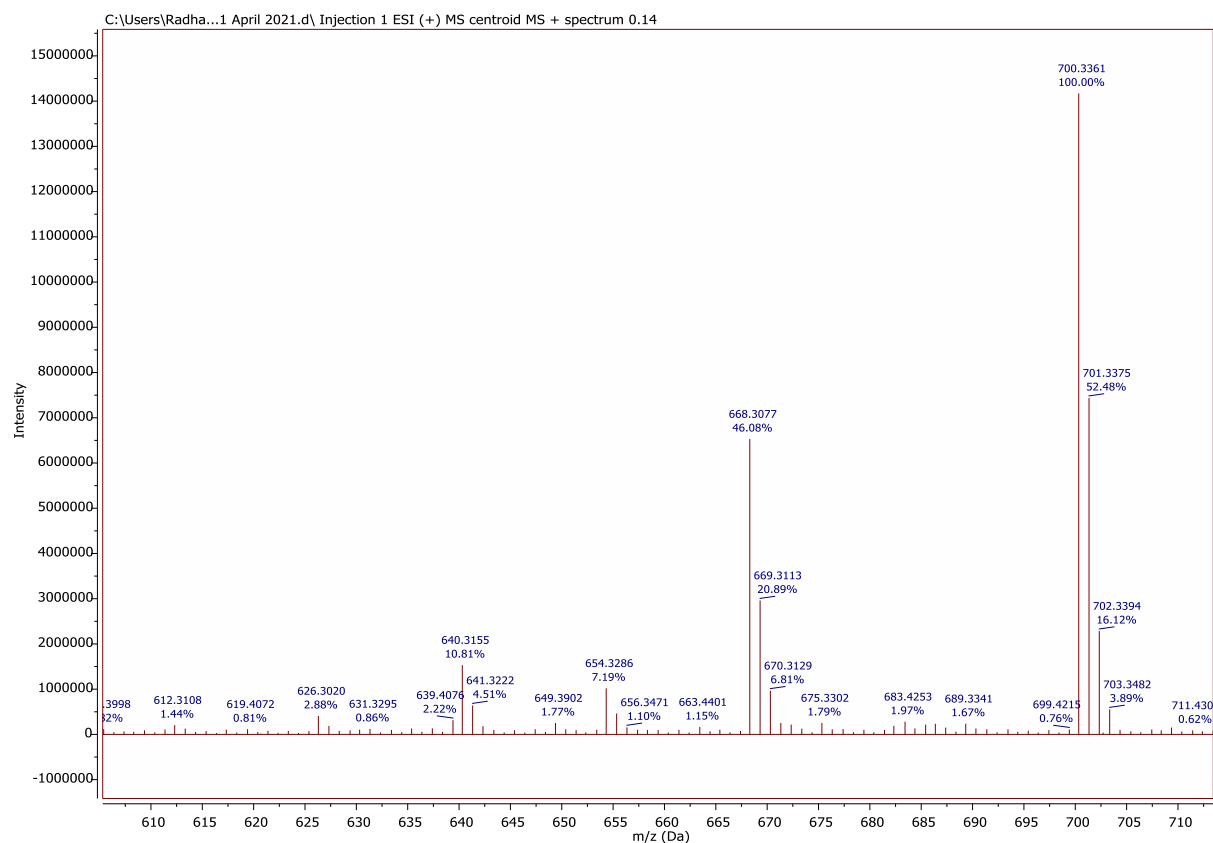

Figure S27. HR-ESI-MS spectrum of compound 4

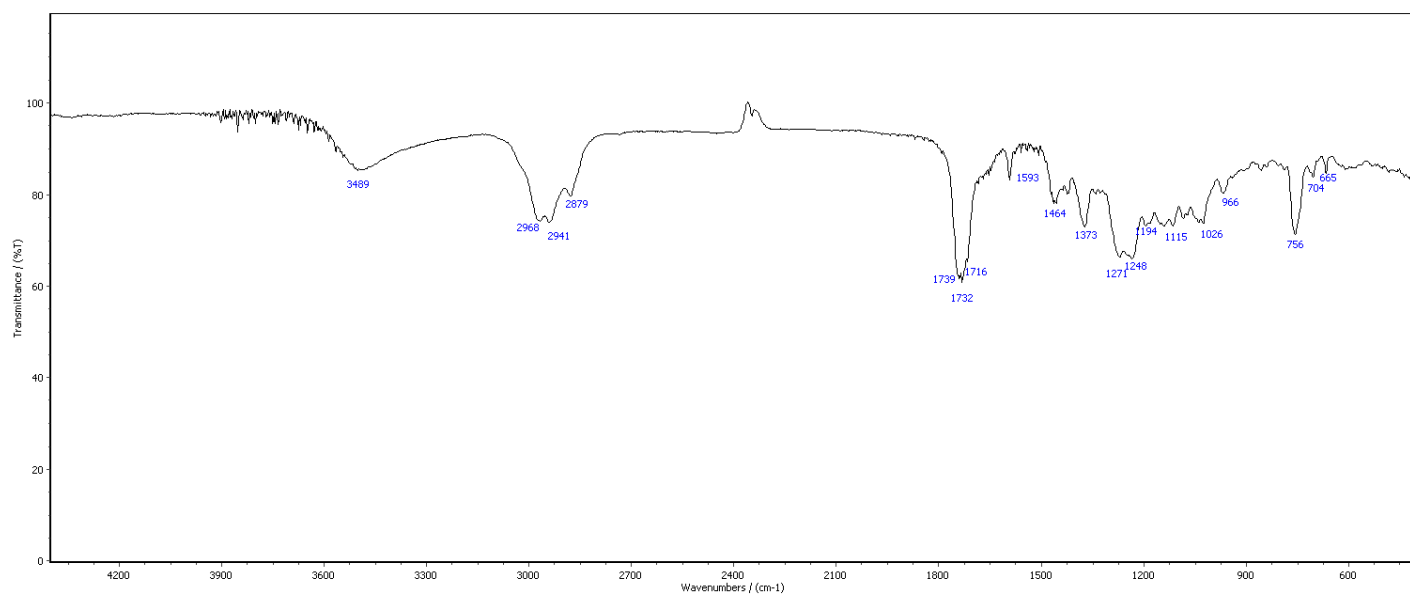

Instrument model=WQF-510 resolution=4 scan times=20

2006/12/31 6:20 YZ-10-EG.ASF

Figure S28. FT-IR spectrum of compound 4

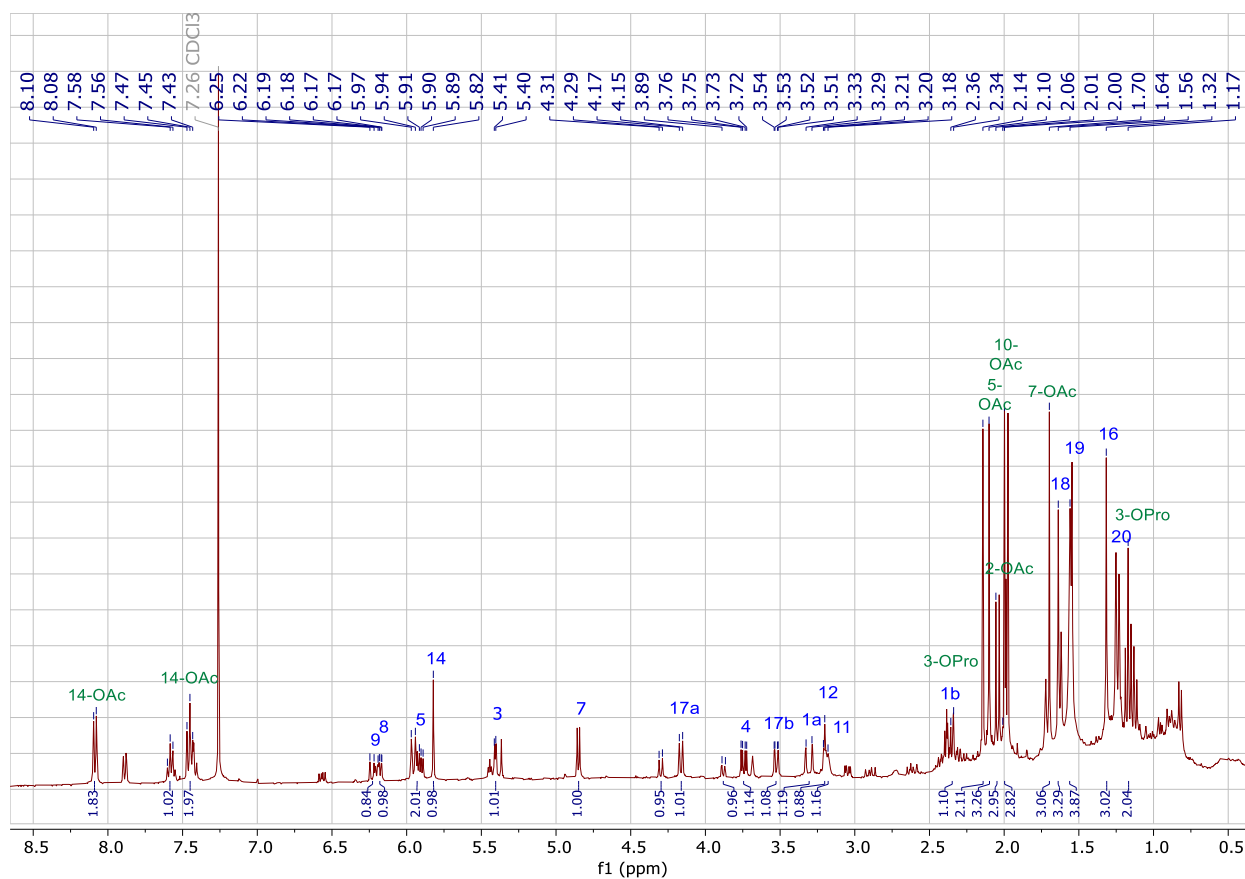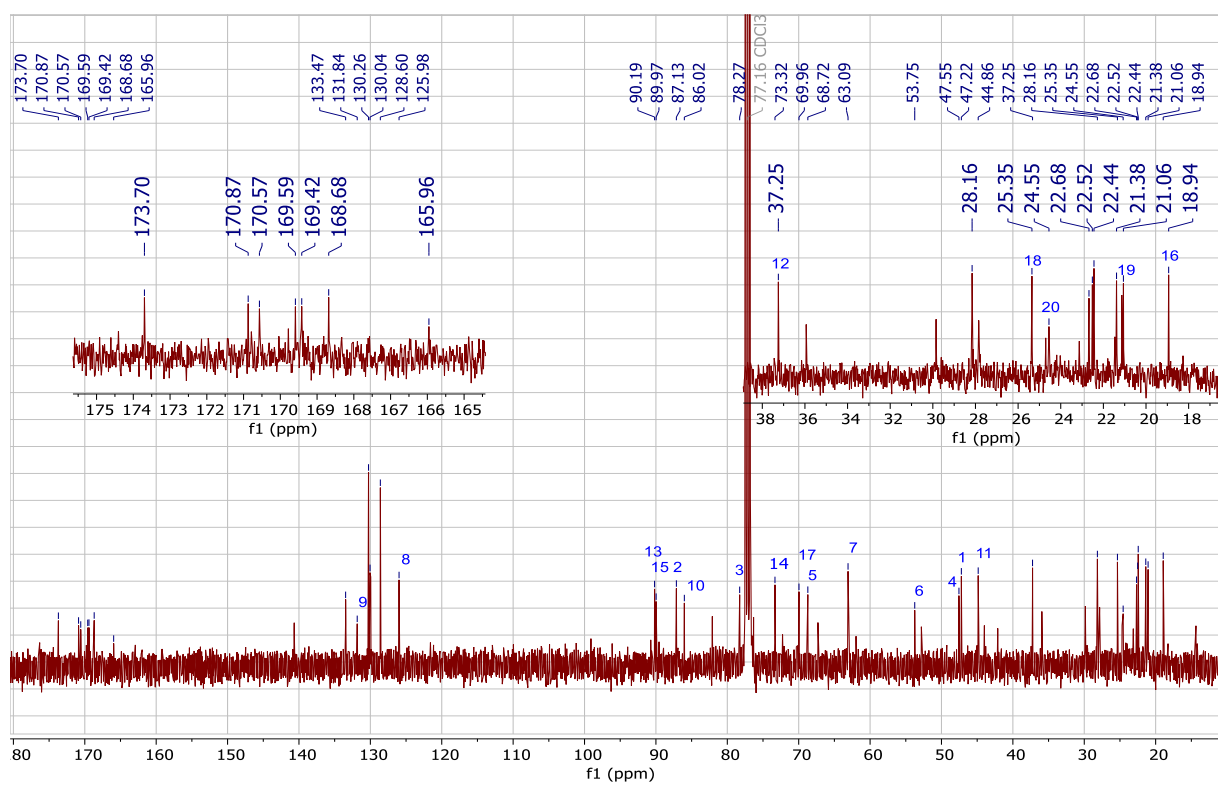

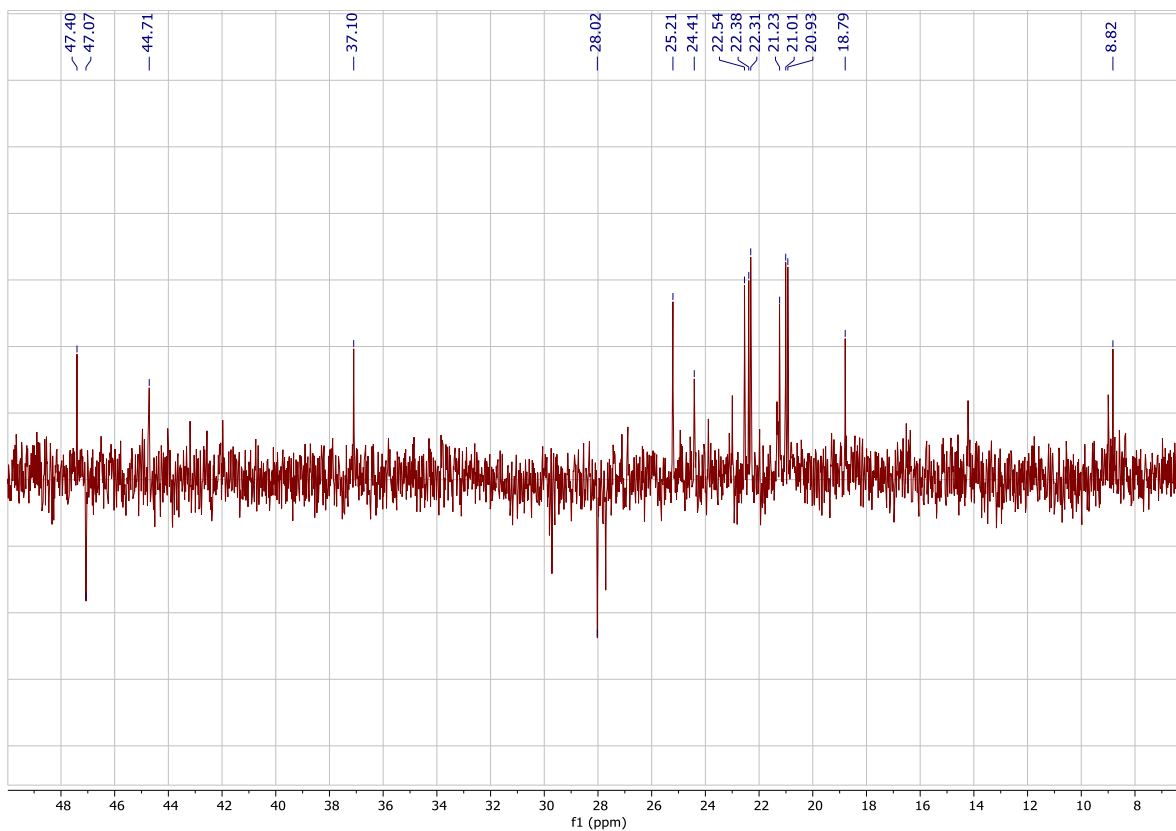

**Figure S31.**  $^{13}\text{C}$  DEPT135 (100 MHz) spectrum of compound **5**

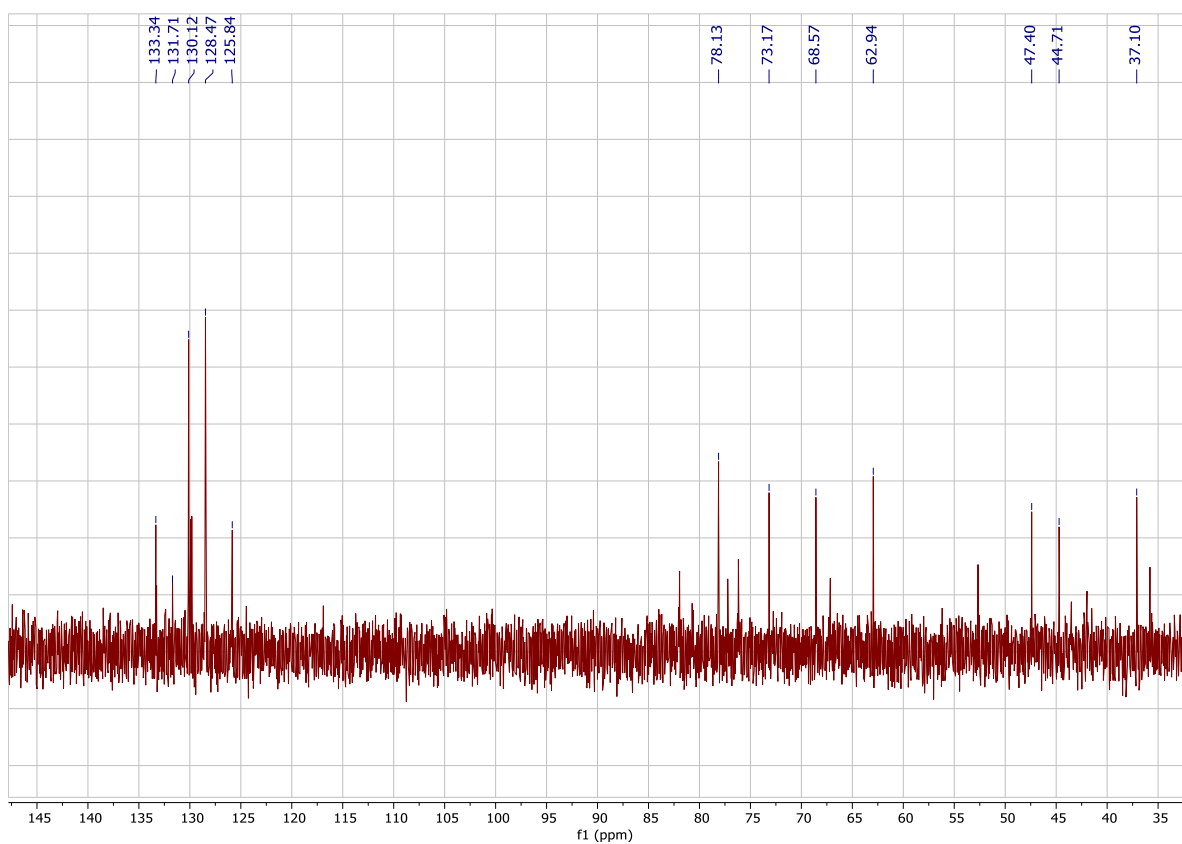

**Figure S32.**  $^{13}\text{C}$  DEPT90 (100 MHz) spectrum of compound **5**

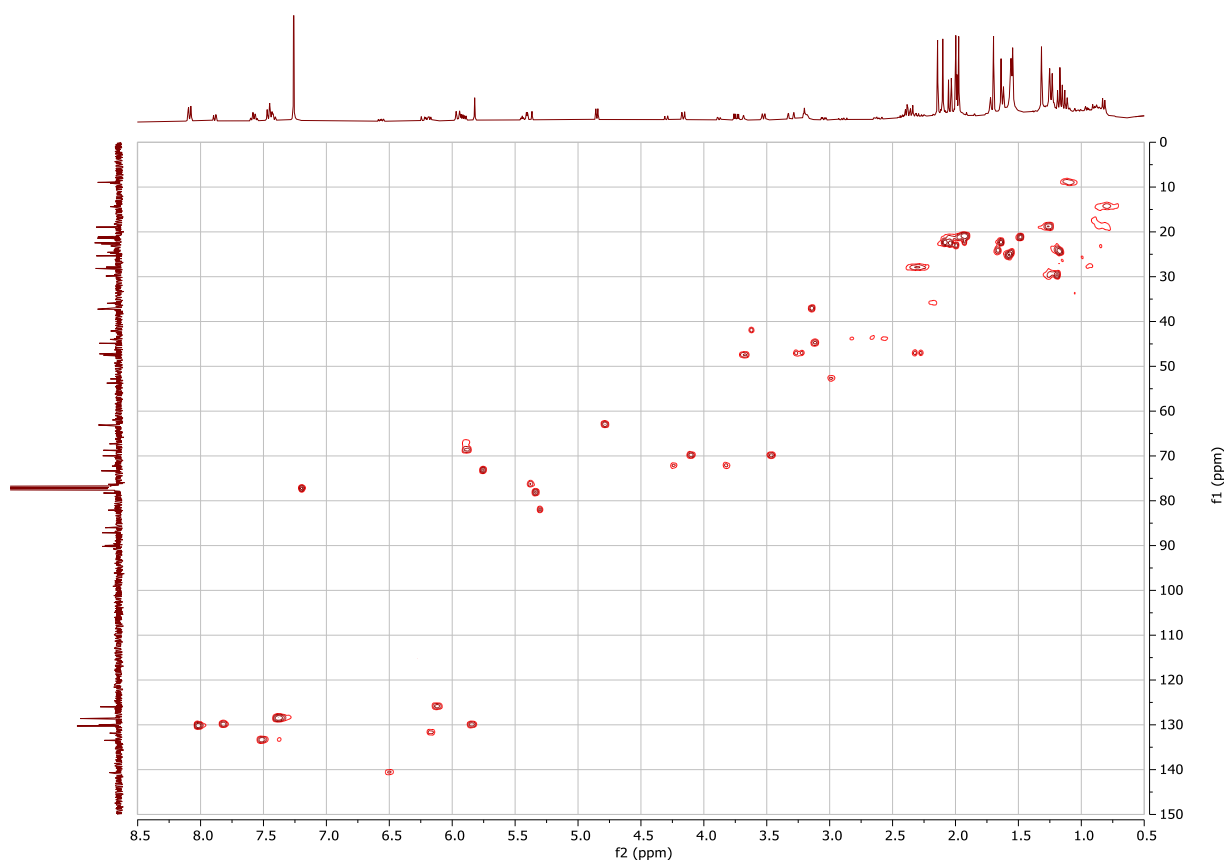

Figure S33. HSQCGP (400 MHz) spectrum of compound 5

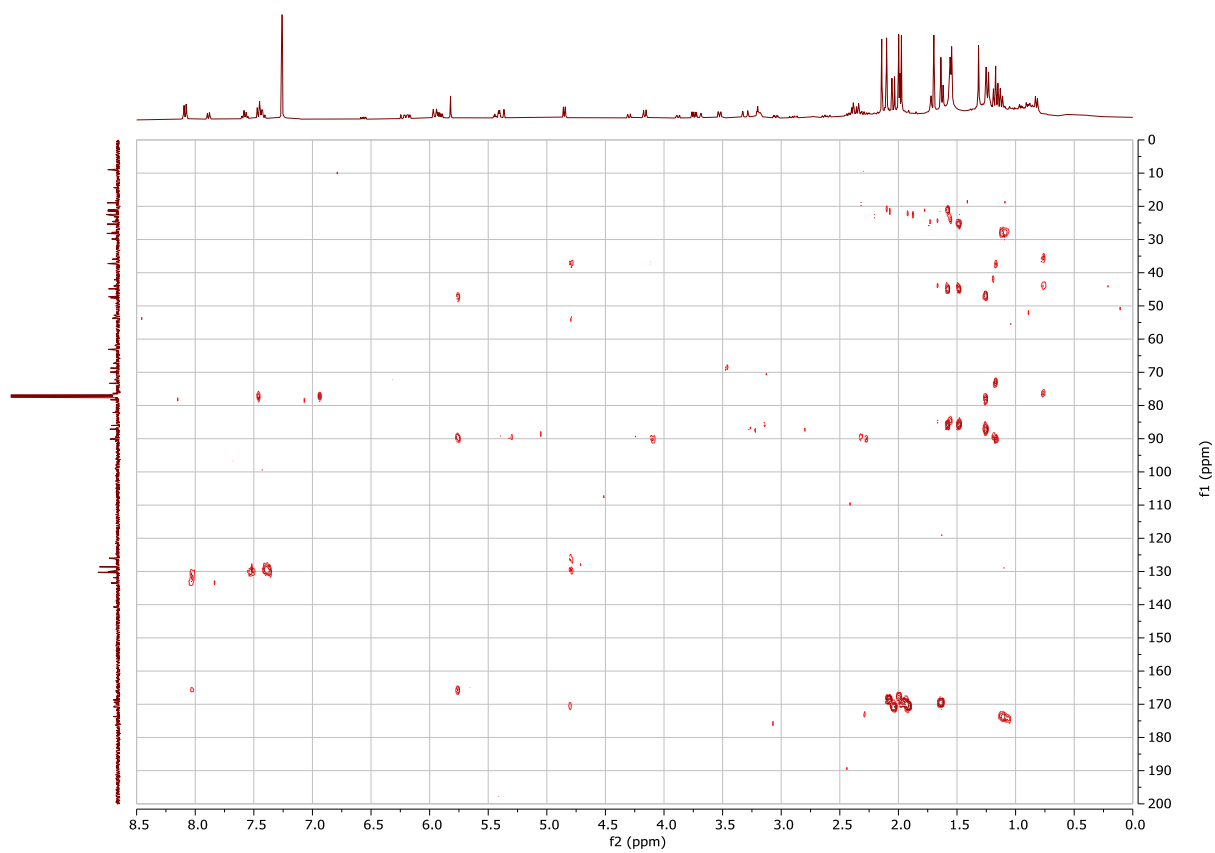

Figure S34. HMBCGP (400 MHz) spectrum of compound 5

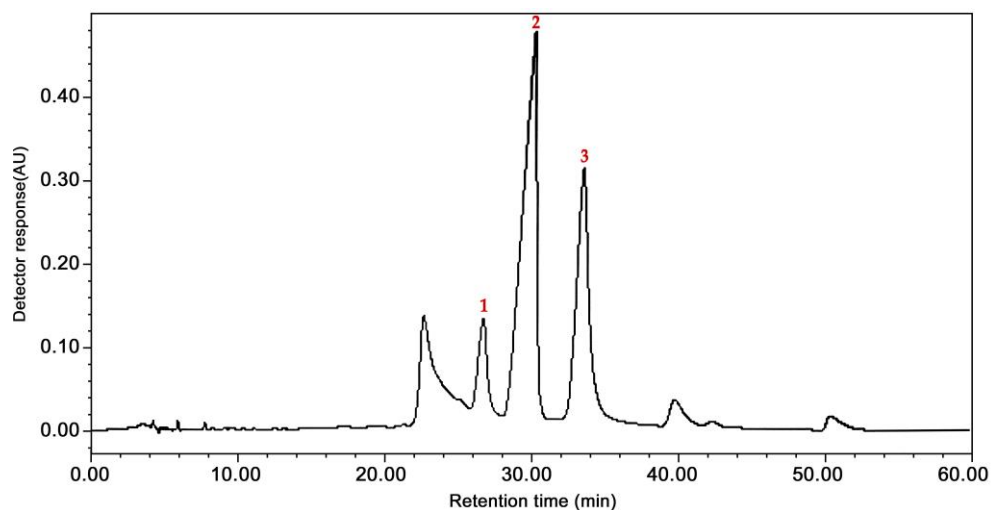

**Figure S35.** HPLC chromatogram of fraction 5 showing peaks corresponding to compounds 1, 2 and 3

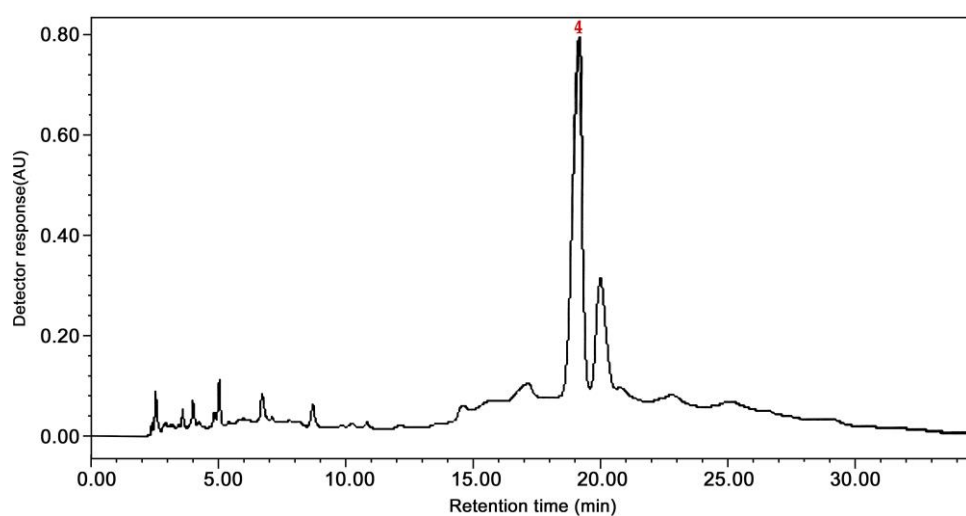

**Figure S36.** HPLC chromatogram of fraction 10-1 showing peak corresponding to compound 4

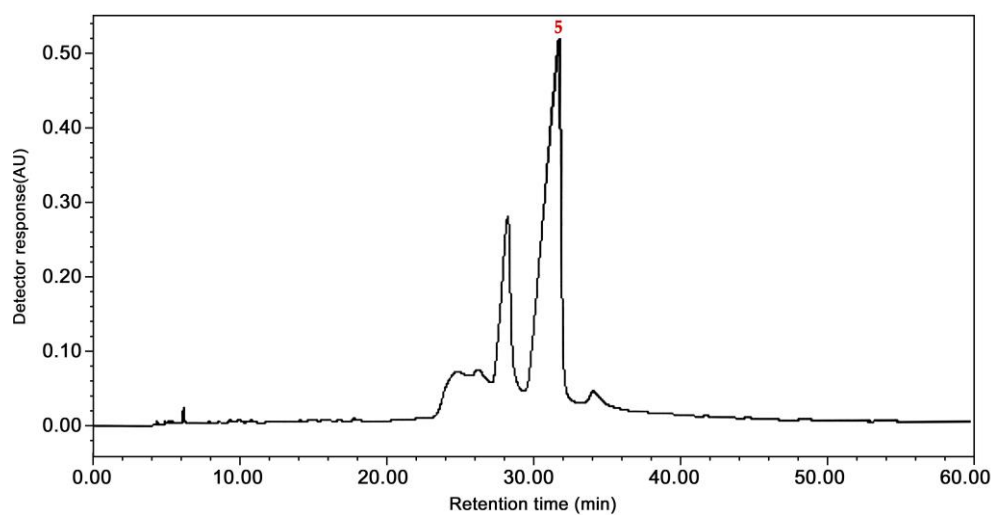

**Figure S37.** HPLC chromatogram of fraction 9 showing peak corresponding to compound 5
